# Supplementary material
Source: PubMed Central journal article supplement (PMC5417700)
Supplement: NIHMS855234-supplement-Supplemental_Materials.pdf [file NIHMS855234-supplement-Supplemental_Materials.pdf]

**Probing the Allosteric Role of the  $\alpha 5$  Subunit of  $\alpha 3\beta 4\alpha 5$   
Nicotinic Acetylcholine Receptors by Functionally Selective  
Modulators and Ligands**

Caroline Ray, Erik J. Soderblom, Yushi Bai, F. Ivy Carroll, Marc G. Caron, and  
Larry S. Barak

Supporting Information

## Supplemental Figure Legends and Figures

**Supplemental Figure 1S. Primary Screen of the Directed Specs Chemicals Library against Cell Lines Expressing  $\alpha 3\beta 4$ ,  $\alpha 3\beta 4\alpha 5$  and  $\alpha 3\beta 4\alpha 5D398N$  nAChRs – A.** Three 96 well plate, single point antagonist assays were performed in permanent HEK-293 cell lines containing a distinct receptor. The cells were pre-incubated with 32  $\mu\text{M}$  of a library compound for 15-30 minutes followed by the sequential addition of 20  $\mu\text{M}$  nicotine to an individual well. Calcium response data were acquired on a BMG Clariostar. Single point responses were calculated from three independent experiments and the results plotted per compound position in the daughter plate. The response to nicotine alone determined from eight control wells was used to calculate standard deviations in the calcium response. Lead compounds were identified as those that inhibited the calcium response to at least 7 standard deviations below cells treated with nicotine alone. Data were analyzed and plotted using GraphPad Prism 5.0. **B.** Compounds were binned based upon their effect on nicotine mediated calcium signaling relative to the mean nicotine calcium response ( $mr_n$ ) and its standard deviation ( $std_n$ ). An assignment of 0, 1, 2, 3, corresponded to a nicotine response in the presence of compound in the range ( $mr_n \pm 3 std_n$ ), ( $mr_n - 3std_n$  to  $mr_n - 5std_n$ ), ( $mr_n - 5std_n$  to  $mr_n - 7std_n$ ), and less than ( $mr_n - 7 std_n$ ) respectively. Values from the three experiments were averaged for each receptor type and the corresponding cell in the compound table for that receptor colorized to enable response bias across receptors to

be easily appreciated. Positive modulators of the calcium signal above 3 standard deviation from the mean were assigned a value of -1.

**Supplemental Figure 2S. Screening of a Directed Library against Cell Lines Expressing**

**$\alpha3\beta4$ ,  $\alpha3\beta4\alpha5$  and  $\alpha3\beta4\alpha5D398N$  nAChRs** – Antagonist assays were performed as described for the remaining 22 of 38 compounds from the directed Specs Chemicals Library that were considered hits in the primary screen. Dose responses were calculated from triplicate wells in three independent experiments to determine the effects of compounds on inhibition of the whole cell calcium mediated nicotine (20  $\mu$ M) response in HEK-293 cell-lines permanently transfected with one of the nAChRs. Data were analyzed using GraphPad Prism 5.0 and the results are presented as 95% confidence intervals.

A.

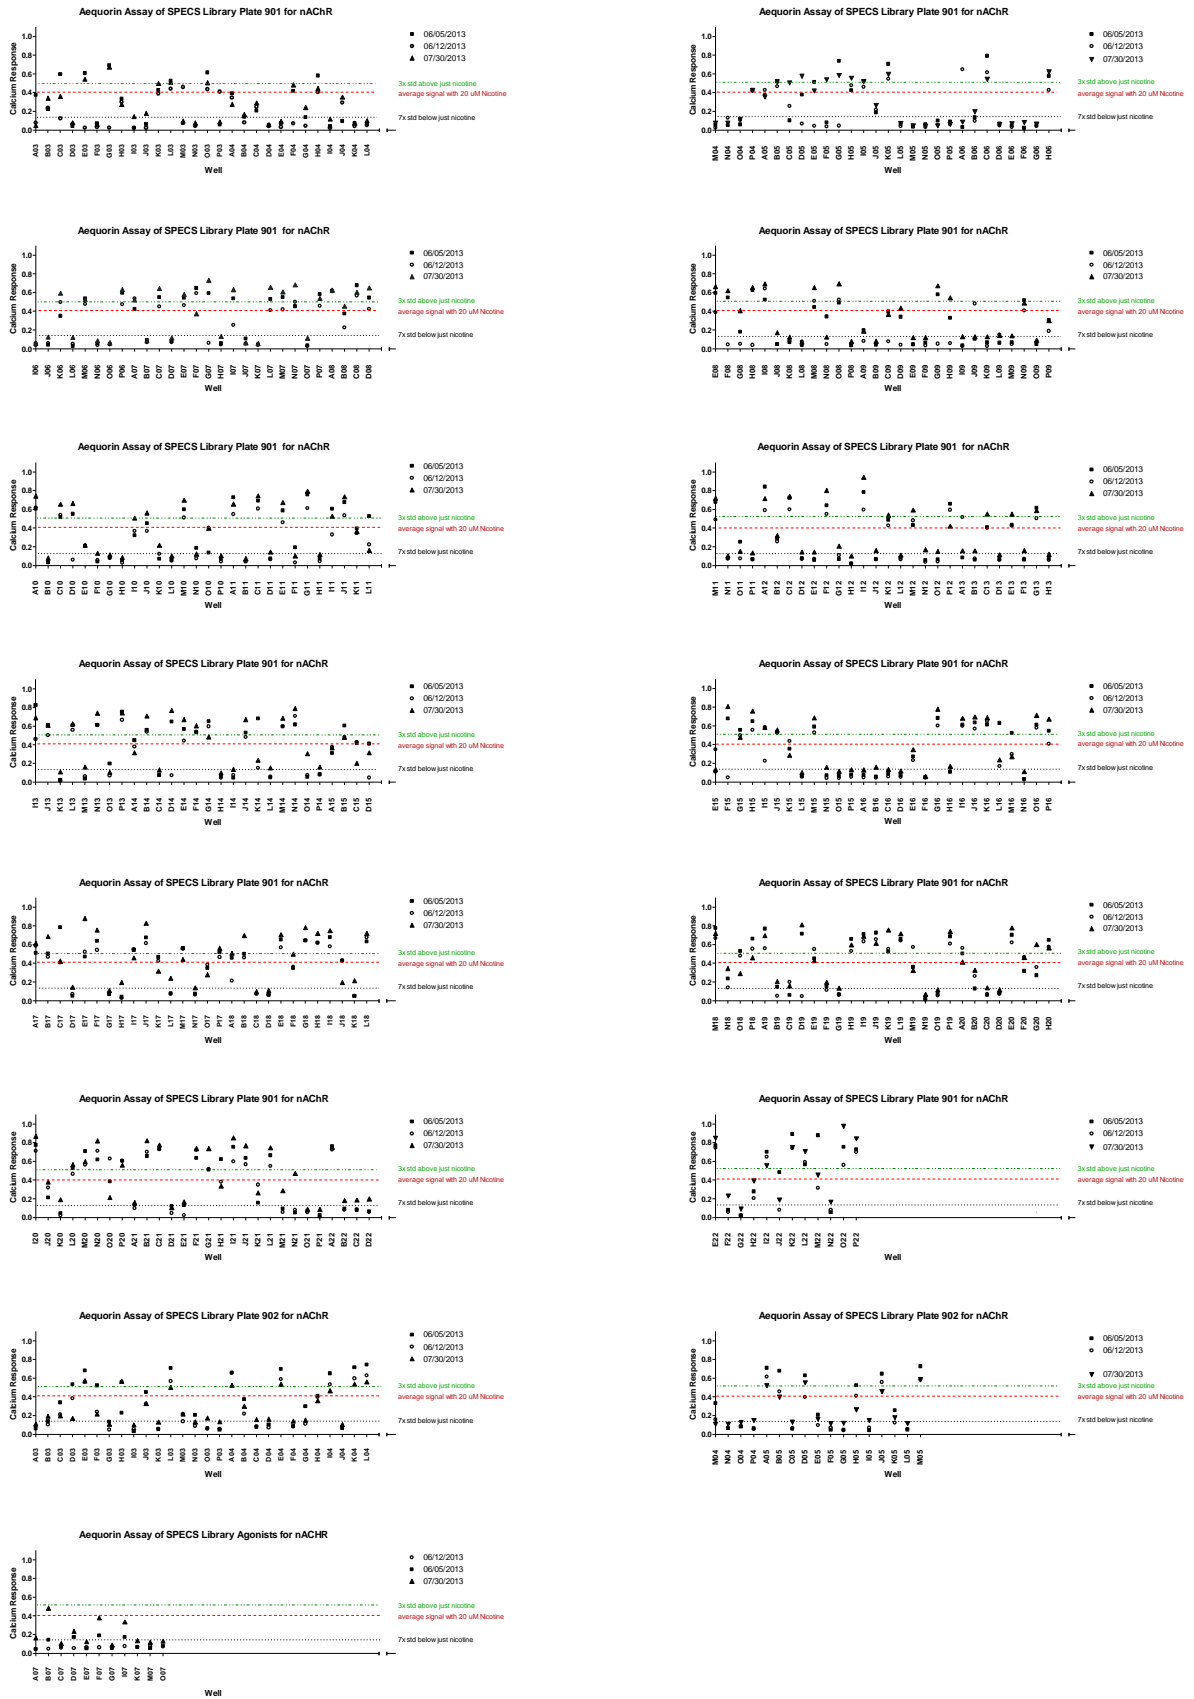

Supplemental Figure 1S

Supplemental Figure 15-B.  
 Aequorin Cell-base Calcium Screen of Nicotine Activation  
 N=3 for each receptor  
 Library Screened at 32 μM

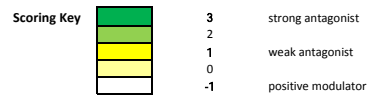

| Specs ID-Number | Well | A3B4 (avg) | std  | A3B4A5 wt (avg) | std  | A3B4A5-D398N (avg) | std  | MOLSTRUCTURE                                                                         | NAME                                                                     | MW     | Formula        |
|-----------------|------|------------|------|-----------------|------|--------------------|------|--------------------------------------------------------------------------------------|--------------------------------------------------------------------------|--------|----------------|
| AK-968/41927491 | A03  | 3.00       | 0.00 | 2.67            | 0.58 | 3.00               | 0.00 | 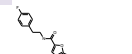   | 5-bromo-N-[2-(4-fluorophenyl)ethyl]-2-furamide                           | 312.14 | C13H11BrFNO2   |
| AK-968/37005227 | A04  | 2.00       | 1.00 | 1.00            | 1.73 | 1.67               | 0.58 |    | 5-bromo-N'-[1-(4-chlorophenyl)propylidene]-2-furohydrazide               | 355.62 | C14H12BrClN2O2 |
| AK-968/37005307 | A05  | 1.67       | 1.15 | 1.00            | 1.73 | 2.00               | 1.00 |    | 5-bromo-N-(4-methoxybenzylidene)-2-furohydrazide                         | 323.15 | C13H11BrN2O3   |
| AN-329/42239496 | A06  | 2.00       | 1.73 | 2.67            | 0.58 | 2.00               | 1.73 |    | N-benzyl-5-bromo-N-(cyclobutylmethyl)-2-furamide                         | 348.24 | C17H18BrN2O2   |
| AK-968/37005275 | A07  | 1.00       | 1.73 | 1.33            | 1.53 | 1.33               | 1.15 |    | 5-bromo-N-(pyridin-2-ylmethylene)-2-furohydrazide                        | 294.11 | C11H8BrN3O2    |
| AO-365/43264267 | A08  | 0.00       | 0.00 | 0.67            | 1.53 | 0.00               | 0.00 |    | N-[2-[(5-bromo-2-furoyl)amino]ethyl]nicotinamide                         | 338.16 | C13H12BrN3O3   |
| AK-968/41026442 | A09  | 3.00       | 0.00 | 1.00            | 1.00 | 1.67               | 1.15 |    | 5-bromo-N'-(3,5-di-tert-butyl-4-hydroxybenzylidene)-2-furohydrazide      | 421.34 | C20H25BrN2O3   |
| AN-329/41675179 | A10  | -0.33      | 0.58 | 0.67            | 1.15 | 0.67               | 1.15 |    | 4-chlorophenyl 5-bromo-2-furoate                                         | 301.53 | C11H6BrClO3    |
| AN-465/42887956 | A11  | -0.33      | 0.58 | 0.00            | 0.00 | 0.67               | 0.58 |    | 5-bromo-N-[5-chloro-2-(4-morpholinyl)phenyl]-2-furamide                  | 385.65 | C15H14BrClN2O3 |
| AO-365/43264266 | A12  | -0.33      | 0.58 | 0.67            | 0.58 | 0.00               | 1.00 |    | N-[3-[(5-bromo-2-furoyl)amino]propyl]-2-pyridinecarboxamide              | 352.19 | C14H14BrN3O3   |
| AN-329/43386012 | A13  | 2.00       | 1.73 | 1.67            | 1.53 | 2.67               | 0.58 |   | N-(5-bromo-2-furoyl)-N'-cyclopentylthiourea                              | 317.21 | C11H13BrN2O2S  |
| AN-329/43385519 | A14  | 2.00       | 1.00 | 1.33            | 0.58 | 2.00               | 0.00 |  | 5-bromo-N-[4-(2-methoxyethoxy)phenyl]-2-furamide                         | 340.18 | C14H14BrNO4    |
| AN-329/43074311 | A15  | 1.67       | 1.15 | 2.33            | 0.58 | 1.00               | 1.00 |  | 5-bromo-N-[2-(1-pyrrolidinylcarbonyl)phenyl]-2-furamide                  | 363.21 | C16H15BrN2O3   |
| AN-329/43237088 | A16  | 3.00       | 0.00 | 1.00            | 2.00 | 1.00               | 1.00 |  | 5-bromo-N-[2-[(2-furylmethyl)amino]carbonyl]phenyl]-2-furamide           | 389.21 | C17H13BrN2O4   |
| AN-329/43385404 | A17  | 0.33       | 0.58 | -0.33           | 0.58 | 0.33               | 1.15 |  | 5-bromo-N-(2-isobutoxyphenyl)-2-furamide                                 | 338.20 | C15H16BrNO3    |
| AN-329/43341759 | A18  | 1.67       | 1.53 | 1.67            | 1.15 | 0.67               | 0.58 |  | 5-bromo-N-[2-[(ethylamino)carbonyl]phenyl]-2-furamide                    | 337.18 | C14H13BrN2O3   |
| AN-329/43341964 | A19  | -0.33      | 0.58 | 1.33            | 1.53 | 0.67               | 0.58 |  | 5-bromo-N-[2-methoxy-5-(trifluoromethyl)phenyl]-2-furamide               | 364.12 | C13H9BrF3NO3   |
| AN-329/43341946 | A20  | 1.00       | 1.00 | 0.67            | 1.15 | 0.00               | 1.00 |  | 5-bromo-N-[5-chloro-2-(2-methoxyethoxy)phenyl]-2-furamide                | 374.62 | C14H13BrClNO4  |
| AN-329/43201204 | A21  | 3.00       | 0.00 | 1.67            | 1.53 | 2.33               | 0.58 |  | 5-bromo-N-[2-(1-piperidinylcarbonyl)phenyl]-2-furamide                   | 377.24 | C17H17BrN2O3   |
| AN-329/43341726 | A22  | -1.00      | 0.00 | 0.33            | 1.53 | 0.00               | 1.00 |  | 5-bromo-N-[2-[(dimethylamino)carbonyl]phenyl]-2-furamide                 | 337.18 | C14H13BrN2O3   |
| AK-778/37026131 | B03  | 2.00       | 1.00 | 0.33            | 0.58 | 1.00               | 1.00 |  | 5-bromo-N-[2-(3,4-dimethylphenyl)-2H-1,2,3-benzotriazol-5-yl]-2-furamide | 411.26 | C19H15BrN4O2   |
| AF-399/33192038 | B04  | 3.00       | 0.00 | 0.67            | 1.15 | 1.33               | 1.53 |  | 4-phenoxyphenyl 5-bromo-2-furoate                                        | 359.18 | C17H11BrO4     |
| AK-968/37005314 | B05  | 0.33       | 0.58 | 0.33            | 0.58 | 0.67               | 0.58 |  | 5-bromo-N-(2-furylmethylene)-2-furohydrazide                             | 283.08 | C10H7BrN2O3    |
| AK-968/37005281 | B06  | 3.00       | 0.00 | 0.67            | 0.58 | 2.00               | 1.73 |  | 5-bromo-N-(3,4,5-trimethoxybenzylidene)-2-furohydrazide                  | 383.20 | C15H15BrN2O5   |
| AG-690/36518051 | B07  | 3.00       | 0.00 | 2.33            | 0.58 | 3.00               | 0.00 |  | 2-[(2H-1,2,3-benzotriazol-2-yl)-4-methylphenyl]-5-bromo-2-furoate        | 398.22 | C18H12BrN3O3   |
| AK-968/41026429 | B08  | 2.00       | 1.00 | 1.33            | 0.58 | 1.67               | 0.58 |  | 2-[4-[N-(5-bromo-2-furoyl)propanehydrazono]phenoxy]acetamide             | 394.23 | C16H16BrN3O4   |
| AK-968/41026443 | B09  | 3.00       | 0.00 | 2.00            | 0.00 | 3.00               | 0.00 |  | 5-bromo-N'-[1-(2,5-dichlorophenyl)ethylidene]-2-furohydrazide            | 376.04 | C13H9BrCl2N2O2 |

|                 |     |       |      |      |      |       |      |                                                                                     |                                                                 |        |                |
|-----------------|-----|-------|------|------|------|-------|------|-------------------------------------------------------------------------------------|-----------------------------------------------------------------|--------|----------------|
| AN-465/42887955 | B10 | 3.00  | 0.00 | 2.67 | 0.58 | 3.00  | 0.00 | 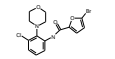   | 5-bromo-N-[3-chloro-2-(4-morpholinyl)phenyl]-2-furamide         | 385.65 | C15H14BrClN2O3 |
| AK-968/41927631 | B11 | 3.00  | 0.00 | 3.00 | 0.00 | 3.00  | 0.00 |    | 5-bromo-N-(1,5-dimethylhexyl)-2-furamide                        | 302.21 | C13H20BrNO2    |
| AN-329/40287115 | B12 | 2.33  | 0.58 | 2.00 | 1.00 | 2.33  | 0.58 |    | 5-bromo-N-[3-((5-bromo-2-furoyl)amino)propyl]-2-furamide        | 420.06 | C13H12Br2N2O4  |
| AN-329/43386006 | B13 | 3.00  | 0.00 | 3.00 | 0.00 | 3.00  | 0.00 |    | N-(5-bromo-2-furoyl)-N'-(2-thienylmethyl)thiourea               | 345.24 | C11H9BrN2O2S2  |
| AN-329/40152489 | B14 | 0.33  | 0.58 | 0.33 | 0.58 | 2.00  | 1.00 |    | 5-bromo-N,N-diethyl-2-furamide                                  | 246.11 | C9H12BrNO2     |
| AN-329/43074367 | B15 | 0.00  | 0.00 | 1.00 | 0.00 | 0.67  | 0.58 |    | N-[2-((allylamino)carbonyl)phenyl]-5-bromo-2-furamide           | 349.19 | C15H13BrN2O3   |
| AN-329/42943502 | B16 | 3.00  | 0.00 | 1.33 | 1.15 | 1.00  | 1.00 |    | 5-bromo-N-[2-((2-phenylethyl)amino)carbonyl]phenyl]-2-furamide  | 413.27 | C20H17BrN2O3   |
| AN-329/43385411 | B17 | 0.67  | 1.15 | 1.00 | 1.00 | -0.33 | 0.58 |    | 5-bromo-N-[2-((methylamino)carbonyl)phenyl]-2-furamide          | 323.15 | C13H11BrN2O3   |
| AN-329/43341860 | B18 | 0.67  | 1.15 | 0.67 | 1.15 | 0.00  | 1.00 |    | 1-(5-bromo-2-furoyl)-4-(2-furoyl)piperazine                     | 353.17 | C14H13BrN2O4   |
| AN-329/43341952 | B19 | 3.00  | 0.00 | 1.67 | 1.15 | 0.33  | 1.15 |    | 5-bromo-N-[4-chloro-2-(4-morpholinyl)phenyl]-2-furamide         | 385.65 | C15H14BrClN2O3 |
| AN-329/43341605 | B20 | 2.00  | 1.00 | 2.00 | 0.00 | 2.00  | 1.00 |    | 2-(((5-bromo-2-furoyl)amino)carbothioylamino)-N-ethylbenzamide  | 396.27 | C15H14BrN3O3S  |
| AH-357/05675054 | B21 | -0.67 | 0.58 | 0.33 | 0.58 | 1.00  | 2.00 |    | 4-(methoxycarbonyl)phenyl 5-bromo-2-furoate                     | 325.12 | C13H9BrO5      |
| AN-329/43341963 | B22 | 3.00  | 0.00 | 0.00 | 0.00 | 0.00  | 1.00 |    | 5-bromo-N-(cyclohexylmethyl)-2-furamide                         | 286.17 | C12H16BrNO2    |
| AG-690/11934028 | C03 | 1.33  | 1.53 | 0.67 | 0.58 | 1.00  | 1.00 |   | 5-bromo-N-(2,4-dibromophenyl)-2-furamide                        | 423.89 | C11H6Br3NO2    |
| AF-399/33192039 | C04 | 2.33  | 0.58 | 0.00 | 0.00 | 0.33  | 0.58 |  | 4-benzoylphenyl 5-bromo-2-furoate                               | 371.19 | C18H11BrO4     |
| AK-968/11367491 | C05 | 1.67  | 1.53 | 1.00 | 0.00 | 1.33  | 1.53 |  | 5-bromo-N'-(2-methylbenzylidene)-2-furohydrazide                | 307.15 | C13H11BrN2O2   |
| AK-968/37005272 | C06 | -0.33 | 0.58 | 1.00 | 0.00 | 1.33  | 0.58 |  | 5-bromo-N'-(4-hydroxy-3,5-dimethoxybenzylidene)-2-furohydrazide | 369.17 | C14H13BrN2O5   |
| AK-968/11367383 | C07 | 0.33  | 0.58 | 0.67 | 0.58 | 0.33  | 0.58 |  | 5-bromo-N'-(3-ethoxy-2-hydroxybenzylidene)-2-furohydrazide      | 353.17 | C14H13BrN2O4   |
| AK-968/11369267 | C08 | 0.00  | 0.00 | 0.00 | 0.00 | 0.67  | 1.15 |  | 1-(5-bromo-2-furoyl)-1H-benzimidazole                           | 291.11 | C12H7BrN2O2    |
| AN-329/41692948 | C09 | 2.33  | 1.15 | 0.00 | 0.00 | 0.00  | 0.00 |  | 2-bromo-4-chlorophenyl 5-bromo-2-furoate                        | 380.42 | C11H5Br2ClO3   |
| AK-968/11369211 | C10 | 0.33  | 0.58 | 0.00 | 0.00 | -0.33 | 0.58 |  | 5-bromo-N-(4-pyridinylmethyl)-2-furamide                        | 281.11 | C11H9BrN2O2    |
| AF-399/40769066 | C11 | -0.67 | 0.58 | 0.33 | 0.58 | -0.33 | 0.58 |  | N'-[[5-bromo-2-furyl]methylene]-3,5-bisnitrobenzohydrazide      | 383.12 | C12H7BrN4O6    |
| AK-968/41026853 | C12 | -0.67 | 0.58 | 0.00 | 0.00 | -0.33 | 0.58 |  | 4-[2-(5-bromo-2-furoyl)hydrazino]-4-oxobutanoic acid            | 305.09 | C9H9BrN2O5     |
| AK-968/40097430 | C13 | 1.33  | 1.53 | 2.00 | 0.00 | 2.00  | 0.00 |  | N-(1,3-benzodioxol-5-yl)-5-bromo-2-furamide                     | 310.11 | C12H8BrNO4     |
| AN-329/43385833 | C14 | 3.00  | 0.00 | 1.67 | 1.15 | 0.67  | 1.15 |  | 3-(methoxycarbonyl)phenyl 5-bromo-2-furoate                     | 325.12 | C13H9BrO5      |
| AN-329/43385512 | C15 | 2.33  | 1.15 | 2.33 | 0.58 | 2.67  | 0.58 |  | 5-bromo-N-(4-butoxyphenyl)-2-furamide                           | 338.20 | C15H16BrNO3    |
| AN-329/43385627 | C16 | 3.00  | 0.00 | 1.33 | 1.15 | 2.67  | 0.58 |  | 5-bromo-N-[4-(isopentyl)oxy]phenyl]-2-furamide                  | 352.23 | C16H18BrNO3    |
| AN-329/43385839 | C17 | 0.33  | 1.15 | 2.00 | 0.00 | 2.00  | 1.00 |  | N-[4-(allyloxy)phenyl]-5-bromo-2-furamide                       | 322.16 | C14H12BrNO3    |
| AN-329/41830925 | C18 | 3.00  | 0.00 | 2.67 | 0.58 | 2.67  | 0.58 |  | 2-isopropylphenyl 5-bromo-2-furoate                             | 309.16 | C14H13BrO3     |
| AK-968/11369149 | C19 | 3.00  | 0.00 | 2.33 | 0.58 | 3.00  | 0.00 |  | 5-bromo-N-cycloheptyl-2-furamide                                | 286.17 | C12H16BrNO2    |

Antagonist Screen of the human Nicotinic Acetylcholine Receptor (α3b4, α3b4a5, and α3b4a5 D398N  
 Specs Chemicals Directed Library 1-27-2014  
 Duke University/NIDA P30 Center of Excellence  
 Contact: L. Barak, C Ray, or M. Caron 919-684-6245 (6606) (5433)

|                 |     |       |      |      |      |       |      |                                                                                      |                                                                                |        |               |
|-----------------|-----|-------|------|------|------|-------|------|--------------------------------------------------------------------------------------|--------------------------------------------------------------------------------|--------|---------------|
| AN-329/42831287 | C20 | 3.00  | 0.00 | 2.33 | 0.58 | 1.33  | 1.15 | 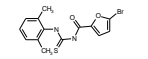   | N-(5-bromo-2-furoyl)-N'-(2,6-dimethylphenyl)thiourea                           | 353.24 | C14H13BrN2O5S |
| AN-329/43341961 | C21 | -1.00 | 0.00 | 0.33 | 0.58 | -0.33 | 0.58 |    | N-[2-(benzyloxy)-5-chlorophenyl]-5-bromo-2-furamide                            | 406.67 | C18H13BrClNO3 |
| AN-329/43337212 | C22 | 3.00  | 0.00 | 2.33 | 1.15 | 2.67  | 0.58 |    | 5-bromo-N-cyclohexyl-N-methyl-2-furamide                                       | 286.17 | C12H16BrNO2   |
| AF-399/33192035 | D03 | 3.00  | 0.00 | 1.33 | 0.58 | 1.67  | 1.15 |    | N,N-dibenzyl-5-bromo-2-furamide                                                | 370.25 | C19H16BrNO2   |
| AN-329/40744097 | D04 | 3.00  | 0.00 | 3.00 | 0.00 | 3.00  | 0.00 |    | 5-bromo-N-[4-[(diethylamino)sulfonyl]phenyl]-2-furamide                        | 401.28 | C15H17BrN2O4S |
| AK-968/11367293 | D05 | 2.00  | 1.73 | 0.33 | 0.58 | 0.67  | 1.15 |    | 5-bromo-N'-(1-methylpropylidene)-2-furohydrazide                               | 259.10 | C9H11BrN2O2   |
| AK-968/11367435 | D06 | 3.00  | 0.00 | 2.67 | 0.58 | 3.00  | 0.00 |    | 5-bromo-N-(2-ethoxybenzylidene)-2-furohydrazide                                | 337.18 | C14H13BrN2O3  |
| AG-690/36465058 | D07 | 3.00  | 0.00 | 1.67 | 0.58 | 1.67  | 1.53 |    | 1-(5-bromo-2-furoyl)indoline                                                   | 292.13 | C13H10BrNO2   |
| AN-329/40744082 | D08 | 0.67  | 0.58 | 0.67 | 0.58 | 0.33  | 0.58 |    | 5-bromo-N-(2-cyanophenyl)-2-furamide                                           | 291.11 | C12H7BrN2O2   |
| AN-329/41770440 | D09 | 2.33  | 1.15 | 0.67 | 0.58 | 0.67  | 1.15 |    | 5-bromo-N-[(2-[(4-methoxyphenoxy)acetyl]hydrazino)carbiothyl]-2-furamide       | 428.26 | C15H14BrN3O5S |
| AG-690/08791039 | D10 | 1.33  | 1.53 | 0.33 | 0.58 | -0.33 | 0.58 |    | 6,10,16,19-tetraoxatrispiro[4.2.2.4.2]nonadecane                               | 268.36 | C15H24O4      |
| AK-968/12117231 | D11 | 3.00  | 0.00 | 2.67 | 0.58 | 2.67  | 0.58 |    | 1-(5-bromo-2-furoyl)-4-(4-fluorophenyl)piperazine                              | 353.19 | C15H14BrFN2O2 |
| AK-918/41206409 | D12 | 3.00  | 0.00 | 1.00 | 1.00 | 1.67  | 1.53 |    | 2-(4-cyclohexylphenyl)-2-oxoethyl 5-bromo-2-furoate                            | 391.26 | C19H19BrO4    |
| AK-968/40605655 | D13 | 3.00  | 0.00 | 2.00 | 0.00 | 1.67  | 1.53 |   | 5-bromo-N-(2,4,6-trimethoxybenzylidene)-2-furohydrazide                        | 383.20 | C15H15BrN2O5  |
| AN-329/43385516 | D14 | 0.67  | 2.08 | 0.67 | 0.58 | 0.33  | 1.53 |  | 5-bromo-N-[4-(2-phenoxyethoxy)phenyl]-2-furamide                               | 402.25 | C19H16BrNO4   |
| AN-329/43385511 | D15 | 2.67  | 0.58 | 2.33 | 0.58 | 2.67  | 0.58 |  | 5-bromo-N-(4-isobutoxyphenyl)-2-furamide                                       | 338.20 | C15H16BrNO3   |
| AN-329/43385624 | D16 | 3.00  | 0.00 | 2.33 | 0.58 | 2.33  | 0.58 |  | 5-bromo-N-(4-isopropoxyphenyl)-2-furamide                                      | 324.18 | C14H14BrNO3   |
| AN-329/43385393 | D17 | 3.00  | 0.00 | 2.33 | 0.58 | 3.00  | 0.00 |  | 3-(propionylamino)phenyl 5-bromo-2-furoate                                     | 338.16 | C14H12BrNO4   |
| AN-329/42724817 | D18 | 3.00  | 0.00 | 1.33 | 1.15 | 2.33  | 0.58 |  | 2,3-dimethylphenyl 5-bromo-2-furoate                                           | 295.13 | C13H11BrO3    |
| AN-329/43197468 | D19 | 0.33  | 2.31 | 0.00 | 0.00 | -0.33 | 0.58 |  | 4-(5-bromo-2-furoyl)-3-ethyl-2-piperazinone                                    | 301.14 | C11H13BrN2O3  |
| AN-329/43341960 | D20 | 3.00  | 0.00 | 2.33 | 0.58 | 2.33  | 1.15 |  | 5-bromo-N-ethyl-N-(3-methylphenyl)-2-furamide                                  | 308.18 | C14H14BrNO2   |
| AN-329/42955283 | D21 | 3.00  | 0.00 | 1.67 | 1.53 | 0.33  | 0.58 |  | N-[2-(benzylamino)carbonyl]phenyl]-5-bromo-2-furamide                          | 399.25 | C19H15BrN2O3  |
| AN-329/42613182 | D22 | 3.00  | 0.00 | 1.67 | 0.58 | 0.33  | 0.58 |  | 5-bromo-N-[2-[(cyclohexylamino)carbonyl]phenyl]-2-furamide                     | 391.27 | C18H19BrN2O3  |
| AG-670/11881016 | E03 | 1.00  | 1.73 | 0.67 | 0.58 | 1.00  | 1.00 |  | 5-bromo-N-[4-[(3-methylbenzoyl)amino]phenyl]-2-furamide                        | 399.25 | C19H15BrN2O3  |
| AN-329/40744080 | E04 | 3.00  | 0.00 | 2.33 | 0.58 | 2.33  | 1.15 |  | 5-bromo-N-(4-cyanophenyl)-2-furamide                                           | 291.11 | C12H7BrN2O2   |
| AN-329/40744078 | E05 | 1.67  | 1.15 | 1.67 | 0.58 | 1.67  | 0.58 |  | N-[4-(acetyl(methyl)amino)phenyl]-5-bromo-2-furamide                           | 337.18 | C14H13BrN2O3  |
| AK-968/11367331 | E06 | 3.00  | 0.00 | 3.00 | 0.00 | 3.00  | 0.00 |  | 5-bromo-N'-[1-(2,4-dimethylphenyl)ethylidene]-2-furohydrazide                  | 335.20 | C15H15BrN2O2  |
| AN-329/40744085 | E07 | 0.33  | 0.58 | 0.67 | 0.58 | 0.00  | 0.00 |  | 5-bromo-N-(3-cyanophenyl)-2-furamide                                           | 291.11 | C12H7BrN2O2   |
| AG-690/10117038 | E08 | 0.33  | 0.58 | 0.67 | 0.58 | 2.00  | 0.00 |  | 5-bromo-N-[4-(3-(4-[(5-bromo-2-furoyl)amino]phenoxy)phenoxy)phenyl]-2-furamide | 638.27 | C28H18Br2N2O6 |
| AK-968/40707711 | E09 | 3.00  | 0.00 | 3.00 | 0.00 | 3.00  | 0.00 |  | N-[3-[N-(5-bromo-2-furoyl)ethanehydrazono]phenyl]-5-methyl-2-furamide          | 430.26 | C19H16BrN3O4  |

|                 |     |       |      |       |      |       |      |                                                                                      |                                                                                        |        |                 |
|-----------------|-----|-------|------|-------|------|-------|------|--------------------------------------------------------------------------------------|----------------------------------------------------------------------------------------|--------|-----------------|
| AL-281/15329053 | E10 | 2.33  | 0.58 | 1.00  | 1.00 | 0.67  | 0.58 | 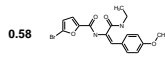   | 5-bromo-N-[(1-ethylamino)carbonyl]-2-(4-methoxyphenyl)vinyl-2-furamide                 | 393.24 | C17H17BrN2O4    |
| AK-968/11986799 | E11 | 0.00  | 0.00 | 0.33  | 0.58 | 0.00  | 0.00 |    | 5-bromo-N-(1,3-dimethyl-2,6-dioxo-1,2,3,6-tetrahydro-4-pyrimidinyl)-2-furamide         | 328.12 | C11H10BrN3O4    |
| AK-918/11684002 | E12 | 3.00  | 0.00 | 2.00  | 0.00 | 1.67  | 1.53 |    | 3-(benzoylamino)phenyl 5-bromo-2-furoate                                               | 386.20 | C18H12BrNO4     |
| AL-281/41935321 | E13 | 1.33  | 1.53 | 0.67  | 0.58 | 0.67  | 0.58 |    | 2-butyl-2-methyl-2,3-dihydro-1H-isoindolium                                            | 190.31 | C13H20N         |
| AN-329/41690001 | E14 | 0.00  | 0.00 | 0.33  | 0.58 | -0.33 | 0.58 |    | 4-propionylphenyl 5-bromo-2-furoate                                                    | 323.15 | C14H11BrO4      |
| AN-465/4200665  | E15 | 2.33  | 1.15 | 3.00  | 0.00 | 2.33  | 0.58 |    | N-[4-(4-benzoyl-1-piperazinyl)-3-chlorophenyl]-5-bromo-2-furamide                      | 488.77 | C22H19BrClN3O3  |
| AG-205/08441024 | E16 | 2.00  | 1.00 | 2.33  | 0.58 | 2.33  | 1.15 |    | 5-bromo-N-(2-naphthyl)-2-furamide                                                      | 316.16 | C15H10BrNO2     |
| AK-968/40218701 | E17 | 0.33  | 1.53 | -0.33 | 0.58 | -0.67 | 0.58 |    | 1-decyl-1-(2-undecynyl)piperidinium                                                    | 376.70 | C26H50N         |
| AK-968/12163749 | E18 | 0.00  | 0.00 | 0.33  | 0.58 | 0.00  | 0.00 |    | N-[3-(aminocarbonyl)-5,6,7,8-tetrahydro-4H-cyclohepta[b]thien-2-yl]-5-bromo-2-furamide | 383.27 | C15H15BrN2O3S   |
| AK-968/11369222 | E19 | 1.33  | 1.53 | 2.00  | 1.00 | 1.33  | 1.53 |    | 5-bromo-N-(4-ethoxy-3-methoxybenzylidene)-2-furohydrazide                              | 367.20 | C15H15BrN2O4    |
| AK-968/11369088 | E20 | -0.67 | 0.58 | 0.00  | 0.00 | 0.67  | 1.15 |    | 5-bromo-N-(2,4,5-trimethoxybenzylidene)-2-furohydrazide                                | 383.20 | C15H15BrN2O5    |
| AM-879/40769453 | E21 | 3.00  | 0.00 | 3.00  | 0.00 | 2.67  | 0.58 |    | 5-bromo-N-[4-(4-chlorophenoxy)phenyl]-2-furamide                                       | 392.64 | C17H11BrClNO3   |
| AN-329/42260836 | E22 | -1.00 | 0.00 | 0.33  | 0.58 | 0.00  | 1.00 |    | 4-(((5-bromo-2-furoylamino)carbothioylamino)-N,N-dimethylbenzenesulfonamide            | 432.32 | C14H14BrN3O4S2  |
| AN-329/40744095 | F03 | 3.00  | 0.00 | 2.67  | 0.58 | 2.67  | 0.58 |   | 5-bromo-N-[2-(1-cyclohexen-1-yl)ethyl]-2-furamide                                      | 298.18 | C13H16BrNO2     |
| AH-034/08461036 | F04 | 2.00  | 1.73 | 1.00  | 0.00 | 0.33  | 0.58 |  | 5-bromo-N-(6-ethoxy-1,3-benzothiazol-2-yl)-2-furamide                                  | 367.22 | C14H11BrN2O3S   |
| AN-329/40744093 | F05 | 2.00  | 1.73 | 1.67  | 0.58 | 1.33  | 1.53 |  | 5-bromo-N-[4-(1-pyrrolidinesulfonyl)phenyl]-2-furamide                                 | 399.27 | C15H15BrN2O4S   |
| AN-329/40744081 | F06 | 3.00  | 0.00 | 3.00  | 0.00 | 3.00  | 0.00 |  | 5-bromo-N-(4-bromo-3-chlorophenyl)-2-furamide                                          | 379.44 | C11H6Br2ClNO2   |
| AG-670/11881010 | F07 | 0.33  | 0.58 | 1.67  | 1.15 | 1.67  | 0.58 |  | 4-bromo-1-naphthyl 5-bromo-2-furoate                                                   | 396.04 | C15H8Br2O3      |
| AK-968/40732327 | F08 | 1.33  | 1.53 | 0.33  | 0.58 | -0.33 | 0.58 |  | 5-bromo-N-(1-ethyl-3,5-dimethyl-1H-pyrazol-4-yl)-2-furamide                            | 312.17 | C12H14BrN3O2    |
| AN-038/15563010 | F09 | 3.00  | 0.00 | 2.00  | 0.00 | 2.67  | 0.58 |  | allyl 2-((5-bromo-2-furoylamino)-3-phenylacrylate                                      | 376.21 | C17H14BrNO4     |
| AO-081/41933640 | F10 | 3.00  | 0.00 | 2.33  | 0.58 | 2.67  | 0.58 |  | 5-bromo-N-(4-chloro-2-methylphenyl)-2-furamide                                         | 314.57 | C12H9BrClNO2    |
| AK-968/11368924 | F11 | 3.00  | 0.00 | 1.33  | 1.15 | 1.67  | 1.53 |  | 5-bromo-N-(4-isopropylphenyl)-2-furamide                                               | 308.18 | C14H14BrNO2     |
| AN-465/42769476 | F12 | -0.33 | 0.58 | 0.00  | 0.00 | -0.33 | 0.58 |  | 5-bromo-N-(4,5-dichloro-1,3-benzothiazol-2-yl)-2-furamide                              | 392.06 | C12H5BrCl2N2O2S |
| AL-281/41935323 | F13 | 3.00  | 0.00 | 2.00  | 0.00 | 3.00  | 0.00 |  | 2-cyclohexyl-2-methyl-2,3-dihydro-1H-isoindolium                                       | 216.35 | C15H22N         |
| AN-329/41967579 | F14 | 0.33  | 0.58 | 1.33  | 0.58 | 0.33  | 0.58 |  | N-(5-bromo-2-furoyl)-N'-(3-methylphenyl)thiourea                                       | 339.21 | C13H11BrN2O2S   |
| AN-979/41972062 | F15 | 0.33  | 2.31 | 1.00  | 1.00 | -0.33 | 0.58 |  | 5-bromo-N-[3-((1,3-dioxo-2,3-dihydro-1H-isoindol-5-yl)oxy)phenyl]-2-furamide           | 427.21 | C19H11BrN2O5    |
| AK-968/11036034 | F16 | 3.00  | 0.00 | 2.33  | 0.58 | 2.00  | 1.00 |  | 5-bromo-N,N-dicyclohexyl-2-furamide                                                    | 354.29 | C17H24BrNO2     |
| AK-968/40208381 | F17 | -0.33 | 0.58 | 0.33  | 0.58 | 0.33  | 0.58 |  | N,N,N-triethyl-2-((6-oxo-6-[2-(triethylammonio)ethoxy]hexanoyl)oxy)ethanaminium        | 402.62 | C22H46N2O4      |
| AK-968/11368975 | F18 | 1.33  | 1.53 | 0.33  | 0.58 | 0.33  | 0.58 |  | 5-bromo-N-(2-fluorophenyl)-2-furamide                                                  | 284.09 | C11H7BrFNO2     |
| AK-968/11369249 | F19 | 3.00  | 0.00 | 1.33  | 0.58 | 2.00  | 0.00 |  | 1-(5-bromo-2-furoyl)-3-methylpiperidine                                                | 272.14 | C11H14BrNO2     |



|                 |     |       |      |      |      |       |      |                                                                                      |                                                                                                     |        |                |
|-----------------|-----|-------|------|------|------|-------|------|--------------------------------------------------------------------------------------|-----------------------------------------------------------------------------------------------------|--------|----------------|
| AK-968/11987447 | F20 | 1.33  | 1.53 | 0.67 | 0.58 | 0.67  | 1.15 | 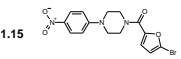   | 1-(5-bromo-2-furoyl)-4-(4-nitrophenyl)piperazine                                                    | 380.20 | C15H14BrN3O4   |
| AN-329/42174071 | F21 | -0.67 | 0.58 | 0.67 | 0.58 | 1.67  | 1.53 |    | 5-bromo-N-(4-((tert-butylamino)sulfonyl)phenyl)-2-furamide                                          | 401.28 | C15H18BrN2O4S  |
| AN-329/42260890 | F22 | 2.67  | 0.58 | 2.00 | 0.00 | 2.00  | 0.00 |    | 5-bromo-N-(4-((dimethylamino)sulfonyl)phenyl)-2-furamide                                            | 373.23 | C13H13BrN2O4S  |
| AG-690/36518052 | G03 | 0.67  | 2.08 | 0.33 | 0.58 | 0.33  | 0.58 |    | 4-(1-(4-((5-bromo-2-furoyl)oxy)phenyl)-1-methylethyl)phenyl 5-bromo-2-furoate                       | 574.23 | C25H18Br2O6    |
| AK-968/36945066 | G04 | 2.67  | 0.58 | 0.67 | 0.58 | 0.67  | 1.15 |    | 5-bromo-2-furaldehyde (5,6-diphenyl-1,2,4-triazin-3-yl)hydrazone                                    | 420.27 | C20H14BrN5O    |
| AK-968/40730805 | G05 | 0.67  | 2.08 | 0.00 | 0.00 | 0.00  | 0.00 |    | 2-(5-bromo-2-furoyl)-N-ethylhydrazinecarbothioamide                                                 | 292.16 | C8H10BrN3O2S   |
| AN-329/40744096 | G06 | 3.00  | 0.00 | 0.67 | 1.15 | 1.33  | 1.53 |    | 5-bromo-N-(4-(4-morpholinylsulfonyl)phenyl)-2-furamide                                              | 415.27 | C15H15BrN2O5S  |
| AG-205/11955495 | G07 | 0.67  | 2.08 | 0.67 | 0.58 | 0.00  | 0.00 |    | N-((5-bromo-2-furyl)methylene)-2-(3-nitrophenoxy)acetohydrazide                                     | 368.15 | C13H10BrN3O5   |
| AK-968/15256132 | G08 | 2.33  | 1.15 | 1.33 | 0.58 | 1.33  | 0.58 |    | 5-bromo-N-(4-methoxy-2-methylphenyl)-2-furamide                                                     | 310.15 | C13H12BrNO3    |
| AL-281/15328027 | G09 | 1.00  | 1.73 | 0.00 | 0.00 | -0.33 | 0.58 |    | 5-bromo-N-(1-((3-hydroxypropyl)amino)carbonyl)-2-phenylvinyl)-2-furamide                            | 393.24 | C17H17BrN2O4   |
| AK-918/13010067 | G10 | 3.00  | 0.00 | 2.00 | 0.00 | 1.67  | 1.53 |    | 3,5-dimethylphenyl 5-bromo-2-furoate                                                                | 295.13 | C13H11BrO3     |
| AK-968/41926264 | G11 | -0.67 | 0.58 | 0.33 | 0.58 | 0.67  | 1.53 |    | 2-(5-bromo-2-furoyl)-N-(3-methylphenyl)hydrazinecarbothioamide                                      | 354.23 | C13H12BrN3O2S  |
| AK-968/11368950 | G12 | 3.00  | 0.00 | 1.67 | 0.58 | 2.33  | 0.58 |    | 5-bromo-N-(2,5-dimethylphenyl)-2-furamide                                                           | 294.15 | C13H11BrNO2    |
| AN-652/11215871 | G13 | 0.00  | 0.00 | 0.33 | 0.58 | -0.33 | 0.58 |   | 4-((5-bromo-2-furoyl)amino)benzoic acid                                                             | 310.11 | C12H8BrNO4     |
| AO-081/41933651 | G14 | 0.00  | 0.00 | 0.33 | 0.58 | -0.33 | 0.58 |  | 1-(5-bromo-2-furoyl)-4-piperidinecarboxamide                                                        | 301.14 | C11H13BrN2O3   |
| AN-979/42273817 | G15 | 0.33  | 0.58 | 1.67 | 1.15 | 0.33  | 1.15 |  | 5-bromo-N-(2-cyclohexyl-1,3-dioxo-2,3-dihydro-1H-isindol-5-yl)-2-furamide                           | 417.26 | C19H17BrN2O4   |
| AN-979/41971613 | G16 | -0.67 | 0.58 | 0.67 | 1.15 | 0.33  | 1.53 |  | 5-bromo-N-(4-[3-(4-bromophenyl)-3-oxo-1-propenyl]phenyl)-2-furamide                                 | 475.14 | C20H13Br2NO3   |
| AN-329/41583613 | G17 | 3.00  | 0.00 | 1.00 | 1.00 | 1.67  | 1.53 |  | 5-bromo-N-ethyl-N-phenyl-2-furamide                                                                 | 294.15 | C13H12BrNO2    |
| AP-064/42710440 | G18 | -0.33 | 0.58 | 0.33 | 0.58 | 0.33  | 1.53 |  | 5-bromo-N-(2-(4-morpholinylcarbonyl)phenyl)-2-furamide                                              | 379.21 | C16H15BrN2O4   |
| AK-968/11367341 | G19 | 3.00  | 0.00 | 2.00 | 0.00 | 2.67  | 0.58 |  | 5-bromo-N-(1-(5-methyl-2-furyl)ethylidene)-2-furohydrazide                                          | 311.14 | C12H11BrN2O3   |
| AK-968/11367505 | G20 | 1.33  | 1.53 | 1.00 | 0.00 | 0.33  | 0.58 |  | 5-bromo-N-(4-hydroxybenzylidene)-2-furohydrazide                                                    | 309.12 | C12H9BrN2O3    |
| AK-968/11368775 | G21 | 0.00  | 1.00 | 0.33 | 0.58 | -0.33 | 0.58 |  | 5-bromo-N-(1-(4-hydroxyphenyl)ethylidene)-2-furohydrazide                                           | 323.15 | C13H11BrN2O3   |
| AP-970/41128478 | G22 | 3.00  | 0.00 | 3.00 | 0.00 | 3.00  | 0.00 |  | 5-bromo-N-(4-bromo-3-methylphenyl)-2-furamide                                                       | 359.02 | C12H9Br2NO2    |
| AK-968/36846007 | H03 | 2.33  | 0.58 | 1.33 | 0.58 | 1.33  | 1.15 |  | 5-bromo-N-(4-(4-(5-bromo-2-furoyl)amino)benzyl)phenyl)-2-furamide                                   | 544.20 | C23H16Br2N2O4  |
| AK-968/10816064 | H04 | 0.67  | 0.58 | 1.00 | 0.00 | 1.33  | 1.15 |  | 5-bromo-N-(2-oxo-2,3-dihydro-1H-benzimidazol-5-yl)-2-furamide                                       | 322.12 | C12H8BrN3O3    |
| AP-970/43374655 | H05 | 1.00  | 1.73 | 0.67 | 0.58 | 0.00  | 0.00 |  | 5-bromo-N-(5-chloro-1,3-benzothiazol-2-yl)-2-furamide                                               | 357.61 | C12H6BrClN2O2S |
| AE-848/32002063 | H06 | 0.33  | 0.58 | 0.67 | 0.58 | 0.33  | 0.58 |  | 2-[4-(4-((2,6-bisnitro-4-(trifluoromethyl)anilino)phenyl)sulfonyl)phenyl]-1H-isindole-1,3(2H)-dione | 612.50 | C27H15F3N4O8S  |
| AK-778/11467049 | H07 | 3.00  | 0.00 | 1.67 | 0.58 | 2.67  | 0.58 |  | 5-bromo-N-(2-(1-naphthyl)-1,3-benzoxazol-5-yl)-2-furamide                                           | 433.26 | C22H13BrN2O3   |
| AL-281/15328031 | H08 | 1.00  | 1.73 | 1.00 | 1.00 | 0.00  | 1.00 |  | 5-bromo-N-(1-(4-methoxyanilino)carbonyl)-2-phenylvinyl)-2-furamide                                  | 441.28 | C21H17BrN2O4   |
| AL-281/15329083 | H09 | 2.00  | 1.73 | 0.67 | 0.58 | 0.67  | 0.58 |  | N-(1-((allylamino)carbonyl)-2-phenylvinyl)-5-bromo-2-furamide                                       | 375.22 | C17H15BrN2O3   |

Antagonist Screen of the human Nicotinic Acetylcholine Receptor (α3b4, α3b4a5, and α3b4a5 D398N)  
 Specs Chemicals Directed Library 1-27-2014  
 Duke University/NIDA P30 Center of Excellence

Contact: L. Barak, C Ray, or M. Caron 919-684-6245 (6606) (5433)

|                 |     |       |      |      |      |       |      |                                                                                     |                                                                                            |        |                |
|-----------------|-----|-------|------|------|------|-------|------|-------------------------------------------------------------------------------------|--------------------------------------------------------------------------------------------|--------|----------------|
| AK-968/12096017 | H10 | 3.00  | 0.00 | 2.00 | 1.00 | 2.33  | 1.15 |    | 5-bromo-N-(3-cyano-4,5,6,7,8,9-hexahydrocyclocta[b]thiophen-2-yl)-2-furamide               | 379.28 | C16H15BrN2O2S  |
| AN-329/43450212 | H11 | 3.00  | 0.00 | 1.67 | 0.58 | 1.33  | 1.53 |    | 5-bromo-N-[2-(tetrahydro-2-furanylmethoxy)phenyl]-2-furamide                               | 366.21 | C16H16BrNO4    |
| AK-968/41753486 | H12 | 3.00  | 0.00 | 3.00 | 0.00 | 3.00  | 0.00 |    | 4-benzyl-1-(5-bromo-2-furoyl)piperidine                                                    | 348.24 | C17H18BrNO2    |
| AO-081/41933655 | H13 | 3.00  | 0.00 | 2.33 | 0.58 | 2.67  | 0.58 |    | 5-bromo-N-(2-tert-butylphenyl)-2-furamide                                                  | 322.20 | C15H16BrNO2    |
| AK-918/42193422 | H14 | 3.00  | 0.00 | 2.67 | 0.58 | 2.33  | 0.58 |    | 2-(2,5-dimethylphenyl)-2-oxoethyl 5-bromo-2-furoate                                        | 337.17 | C15H13BrO4     |
| AN-979/41971619 | H15 | -0.33 | 0.58 | 0.00 | 0.00 | -0.33 | 0.58 |    | 5-bromo-N-(2-hydroxy-5-methylphenyl)-2-furamide                                            | 296.12 | C12H10BrNO3    |
| AN-329/41769822 | H16 | 3.00  | 0.00 | 2.33 | 0.58 | 2.67  | 0.58 |    | N-(5-bromo-2-furoyl)-N-ethyl-N-phenylthiourea                                              | 353.24 | C14H13BrN2O2S  |
| AN-329/41473608 | H17 | 3.00  | 0.00 | 2.33 | 0.58 | 2.67  | 0.58 |    | N-(4-((benzyl(methyl)amino)sulfonyl)phenyl)-5-bromo-2-furamide                             | 449.33 | C19H17BrN2O4S  |
| AK-968/11368711 | H18 | -0.33 | 0.58 | 0.33 | 0.58 | 0.33  | 0.58 |    | N'-[1-(4-aminophenyl)ethylidene]-5-bromo-2-furohydrazide                                   | 322.16 | C13H12BrN3O2   |
| AK-968/11367296 | H19 | 0.00  | 0.00 | 0.00 | 0.00 | 0.00  | 0.00 |    | 5-bromo-N-(1-propylpiperidin-4-ylidene)-2-furohydrazide                                    | 328.21 | C13H18BrN3O2   |
| AK-968/11367481 | H20 | 0.00  | 0.00 | 0.67 | 0.58 | 0.67  | 0.58 |    | 5-bromo-N-(4-bromobenzylidene)-2-furohydrazide                                             | 372.02 | C12H8Br2N2O2   |
| AN-655/41148542 | H21 | 0.67  | 0.58 | 1.00 | 0.00 | 0.67  | 1.15 |    | 3-((5-bromo-2-furyl)(1-methyl-1H-indol-3-yl)methyl)-1-methyl-1H-indole                     | 419.32 | C23H19BrN2O    |
| AK-968/11368844 | H22 | 2.00  | 1.00 | 1.67 | 0.58 | 1.00  | 1.00 |    | 5-bromo-N-(2,6-dimethylphenyl)-2-furamide                                                  | 294.15 | C13H12BrNO2    |
| AN-329/40744090 | I03 | 3.00  | 0.00 | 3.00 | 0.00 | 2.67  | 0.58 |   | N-[4-(1-azepanylsulfonyl)phenyl]-5-bromo-2-furamide                                        | 427.32 | C17H19BrN2O4S  |
| AK-968/37005285 | I04 | 3.00  | 0.00 | 2.67 | 0.58 | 2.67  | 0.58 |  | 1-benzhydryl-4-(5-bromo-2-furoyl)piperazine                                                | 425.33 | C22H21BrN2O2   |
| AP-970/42006640 | I05 | 0.33  | 0.58 | 1.00 | 0.00 | 1.00  | 0.00 |  | 5-bromo-N-[4-(isobutylamino)phenyl]-2-furamide                                             | 351.20 | C15H15BrN2O3   |
| AP-970/43375295 | I06 | 3.00  | 0.00 | 3.00 | 0.00 | 2.33  | 1.15 |  | 5-bromo-N-[5-methoxy-2-(4-morpholinyl)phenyl]-2-furamide                                   | 381.23 | C16H17BrN2O4   |
| AK-778/37120018 | I07 | 1.00  | 1.00 | 0.67 | 0.58 | 0.00  | 0.00 |  | 5-bromo-N-[2-(3-chlorophenyl)-2H-1,2,3-benzotriazol-5-yl]-2-furamide                       | 417.65 | C17H10BrClN4O2 |
| AM-879/15039155 | I08 | 0.33  | 0.58 | 0.00 | 1.00 | -0.33 | 0.58 |  | 5-[(5-bromo-2-furyl)methylene]-1-(2,5-diethoxyphenyl)-2,4,6-(1H,3H,5H)-pyrimidin-3(1H)-one | 449.26 | C19H17BrN2O6   |
| AK-918/12623084 | I09 | 3.00  | 0.00 | 2.33 | 0.58 | 1.00  | 1.73 |  | 2-oxo-1,2-diphenylethyl 5-bromo-2-furoate                                                  | 385.22 | C19H13BrO4     |
| AK-968/11369236 | I10 | 1.33  | 1.53 | 0.67 | 0.58 | 0.00  | 1.00 |  | 1-(5-bromo-2-furoyl)-4-methylpiperidine                                                    | 272.14 | C11H14BrNO2    |
| AK-968/11367471 | I11 | 0.33  | 0.58 | 0.67 | 0.58 | 0.00  | 0.00 |  | 1-(5-bromo-2-furoyl)-1H-1,2,3-benzotriazole                                                | 292.09 | C11H6BrN3O2    |
| AH-262/34397014 | I12 | -0.67 | 0.58 | 0.33 | 0.58 | 1.00  | 1.73 |  | 2-bromo-5-(4-nitrophenyl)furan                                                             | 268.07 | C10H6BrNO3     |
| AH-034/07270026 | I13 | -0.33 | 0.58 | 0.33 | 0.58 | 0.00  | 1.00 |  | 5-bromo-N-(3-pyridinyl)-2-furamide                                                         | 267.08 | C10H7BrN2O2    |
| AN-652/05699061 | I14 | 3.00  | 0.00 | 2.00 | 0.00 | 2.67  | 0.58 |  | 5-bromo-N-(2,4-dimethylphenyl)-2-furamide                                                  | 294.15 | C13H12BrNO2    |
| AN-652/05685026 | I15 | 0.67  | 1.15 | 0.67 | 0.58 | 0.00  | 1.00 |  | N-(4-acetylphenyl)-5-bromo-2-furamide                                                      | 308.13 | C13H10BrNO3    |
| AN-652/05685029 | I16 | 0.00  | 0.00 | 0.33 | 0.58 | 1.00  | 1.73 |  | N-[4-(acetylamino)phenyl]-5-bromo-2-furamide                                               | 323.15 | C13H11BrN2O3   |
| AN-652/12689769 | I17 | 0.67  | 0.58 | 0.67 | 0.58 | 0.33  | 0.58 |  | methyl 2-[(5-bromo-2-furoyl)amino]benzoate                                                 | 324.13 | C13H10BrNO4    |
| AN-329/40744117 | I18 | -0.33 | 0.58 | 0.33 | 0.58 | -0.33 | 0.58 |  | 5-bromo-N-(phenylacetyl)-2-furohydrazide                                                   | 323.15 | C13H11BrN2O3   |
| AN-329/40744129 | I19 | -0.33 | 0.58 | 0.00 | 0.00 | -0.33 | 0.58 |  | 5-bromo-N-(3,4,5-trimethoxybenzoyl)-2-furohydrazide                                        | 399.20 | C15H15BrN2O6   |

|                 |     |       |      |      |      |       |      |                                                                                      |                                                                                                                     |        |                 |
|-----------------|-----|-------|------|------|------|-------|------|--------------------------------------------------------------------------------------|---------------------------------------------------------------------------------------------------------------------|--------|-----------------|
| AN-329/41574520 | I20 | -1.00 | 0.00 | 0.00 | 0.00 | -0.33 | 0.58 | 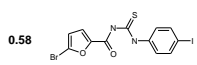   | N-(5-bromo-2-furoyl)-N'-(4-iodophenyl)thiourea                                                                      | 451.08 | C12H8BrIN2O2S   |
| AN-329/41574527 | I21 | -0.67 | 0.58 | 0.00 | 0.00 | -0.33 | 1.15 |    | N-(5-bromo-2-furoyl)-N'-(3,5-dichlorophenyl)thiourea                                                                | 394.08 | C12H7BrCl2N2O2S |
| AK-968/11367319 | I22 | -0.33 | 0.58 | 0.00 | 0.00 | -0.33 | 0.58 |    | 5-bromo-N'-[1-(4-pyridinyl)ethylidene]-2-furohydrazide                                                              | 308.14 | C12H10BrN3O2    |
| AK-918/11939021 | J03 | 3.00  | 0.00 | 1.67 | 1.15 | 2.33  | 0.58 |    | 5-bromo-N-[2-[(5-bromo-2-furoyl)amino][1,1'-biphenyl]-2-yl]-2-furamide                                              | 530.18 | C22H14Br2N2O4   |
| AK-968/37005269 | J04 | 2.00  | 1.00 | 1.33 | 1.53 | 1.33  | 0.58 |    | 5-bromo-N'-[(5-methyl-2-thienyl)methylene]-2-furohydrazide                                                          | 313.17 | C11H9BrN2O2S    |
| AG-205/36915291 | J05 | 2.33  | 0.58 | 1.33 | 0.58 | 1.67  | 1.53 |    | 5-[(5-bromo-2-furyl)methylene]-3-phenyl-2-(phenylimino)-1,3-thiazolidin-4-one                                       | 425.31 | C20H13BrN2O2S   |
| AG-205/07929021 | J06 | 3.00  | 0.00 | 2.00 | 1.00 | 2.33  | 1.15 |    | N'-[(5-bromo-2-furyl)methylene]-2-(2,6-dibromo-4-methylphenoxy)acetohydrazide                                       | 494.97 | C14H11Br3N2O3   |
| AJ-292/41083297 | J07 | 3.00  | 0.00 | 1.00 | 0.00 | 1.33  | 1.53 |    | ethyl 2-[(5-bromo-2-furoyl)amino]-5,5-dimethyl-4,7-dihydro-5H-thieno[2,3-c]pyran-3-carboxylate                      | 428.30 | C17H18BrNO5S    |
| AK-918/12623152 | J08 | 3.00  | 0.00 | 2.33 | 0.58 | 2.33  | 0.58 |    | 2-(4-methoxyphenyl)-2-oxo-1-phenylethyl 5-bromo-2-furoate                                                           | 415.24 | C20H15BrO5      |
| AN-465/42000087 | J09 | 2.00  | 1.73 | 2.00 | 0.00 | 2.33  | 0.58 |    | 5-bromo-N-[4-(4-methyl-piperazinyl)phenyl]-2-furamide                                                               | 364.24 | C16H18BrN3O2    |
| AK-968/11368867 | J10 | 1.33  | 1.53 | 0.67 | 0.58 | 0.67  | 1.15 |    | 5-bromo-N-(2,4-difluorophenyl)-2-furamide                                                                           | 302.08 | C11H6BrF2NO2    |
| AK-968/15603652 | J11 | -0.33 | 0.58 | 0.00 | 0.00 | -0.33 | 0.58 |    | 5-bromo-N-[4-(N-(cyclopropylcarbonyl)ethanehydrazono)phenyl]-2-furamide                                             | 390.24 | C17H16BrN3O3    |
| AK-968/41753488 | J12 | 3.00  | 0.00 | 2.33 | 0.58 | 2.33  | 0.58 |    | 5-bromo-N-[2-(4-methoxyphenyl)ethyl]-2-furamide                                                                     | 324.18 | C14H14BrNO3     |
| AH-034/07270022 | J13 | 0.00  | 0.00 | 0.00 | 0.00 | 0.67  | 1.15 |   | 5-bromo-N-(5-methyl-1,3,4-thiadiazol-2-yl)-2-furamide                                                               | 288.12 | C8H6BrN3O2S     |
| AK-968/14004393 | J14 | 0.33  | 0.58 | 0.00 | 0.00 | 0.00  | 1.00 |  | 5-bromo-N-isopentyl-2-furamide                                                                                      | 260.13 | C10H14BrNO2     |
| AG-690/36545058 | J15 | 0.33  | 0.58 | 0.67 | 0.58 | 0.67  | 1.15 |  | 5-bromo-N-(1,3-thiazol-2-yl)-2-furamide                                                                             | 273.11 | C8H5BrN2O2S     |
| AN-652/11215872 | J16 | 0.00  | 0.00 | 0.67 | 0.58 | 0.00  | 1.00 |  | 3-[(5-bromo-2-furoyl)amino]benzoic acid                                                                             | 310.11 | C12H8BrNO4      |
| AN-652/41376266 | J17 | -0.33 | 0.58 | 0.33 | 0.58 | -0.33 | 0.58 |  | 2-[(5-bromo-2-furoyl)amino]benzoic acid                                                                             | 310.11 | C12H8BrNO4      |
| AN-329/40805545 | J18 | 2.33  | 1.15 | 1.67 | 0.58 | 1.33  | 1.15 |  | 5-bromo-N'-[(2-bromo-4-methylphenoxy)acetyl]-2-furohydrazide                                                        | 432.07 | C14H12Br2N2O4   |
| AN-329/41574511 | J19 | -0.33 | 0.58 | 0.33 | 0.58 | 0.00  | 1.00 |  | N-(5-bromo-2-furoyl)-N'-(2,4-dimethylphenyl)thiourea                                                                | 353.24 | C14H13BrN2O2S   |
| AN-329/41559355 | J20 | 1.67  | 1.15 | 1.00 | 0.00 | 0.33  | 0.58 |  | 5-bromo-N-[(2-thien-2-ylcarbonyl)hydrazino]carbothioyl]-2-furamide                                                  | 374.24 | C11H8BrN3O3S2   |
| AK-968/33942059 | J21 | -0.33 | 0.58 | 0.67 | 0.58 | 0.00  | 1.00 |  | 5-bromo-N-(2,5-dichlorophenyl)-2-furamide                                                                           | 334.99 | C11H6BrCl2NO2   |
| AN-329/43201735 | J22 | 2.67  | 0.58 | 1.00 | 1.00 | 0.67  | 0.58 |  | 5-bromo-N-[2-[(tert-butylamino)carbonyl]phenyl]-2-furamide                                                          | 365.23 | C16H17BrN2O3    |
| AG-205/33111049 | K03 | 1.33  | 1.53 | 0.67 | 0.58 | 0.67  | 1.15 |  | N'-[(5-bromo-2-furyl)methylene]-2-(3-bromophenoxy)acetohydrazide                                                    | 402.04 | C13H10Br2N2O3   |
| AE-562/12222519 | K04 | 3.00  | 0.00 | 2.67 | 0.58 | 2.67  | 0.58 |  | 5-(1,3-benzodioxol-5-ylmethyl)-4-methoxy-6,6-dimethyl-5,6,7,8-tetrahydro-6lambda-5--[1,3]dioxolo[4,5-g]isoquinoline | 370.43 | C21H24NO5       |
| AG-205/36699005 | K05 | -0.33 | 0.58 | 0.00 | 0.00 | 0.67  | 0.58 |  | 2-(3,4-dichlorophenyl)-2-oxoethyl 5-bromo-2-furoate                                                                 | 378.01 | C13H7BrCl2O4    |
| AG-205/36710044 | K06 | 1.00  | 1.73 | 0.67 | 0.58 | 0.33  | 0.58 |  | 4-[[[(5-bromo-2-furyl)methylene]amino]-4-azatricyclo[5.2.2.0-2,6]-undec-8-ene-3,5-dione                             | 349.19 | C15H13BrN2O3    |
| AG-670/37139019 | K07 | 3.00  | 0.00 | 1.00 | 1.00 | 1.67  | 1.53 |  | 3,4-dimethylphenyl 5-bromo-2-furoate                                                                                | 295.13 | C13H11BrO3      |
| AK-968/11368854 | K08 | 3.00  | 0.00 | 2.33 | 0.58 | 2.67  | 0.58 |  | 5-bromo-N-(2-isopropylphenyl)-2-furamide                                                                            | 308.18 | C14H14BrNO2     |
| AK-968/11368900 | K09 | 3.00  | 0.00 | 1.67 | 0.58 | 2.33  | 0.58 |  | 5-bromo-N-(3,5-dimethylphenyl)-2-furamide                                                                           | 294.15 | C13H12BrNO2     |

|                 |     |       |      |       |      |       |      |                                                                                     |                                                                                |        |                |
|-----------------|-----|-------|------|-------|------|-------|------|-------------------------------------------------------------------------------------|--------------------------------------------------------------------------------|--------|----------------|
| AO-081/41933645 | K10 | 2.67  | 0.58 | 2.33  | 0.58 | 1.67  | 0.58 |    | 5-bromo-N-(2-methoxybenzyl)-2-furamide                                         | 310.15 | C13H12BrNO3    |
| AM-879/40861516 | K11 | 1.67  | 1.15 | 2.33  | 0.58 | 0.00  | 1.00 |    | ethyl 5-((5-bromo-2-furyl)methylene)-2,4-dioxo-1,3-thiazolidin-3-yl)acetate    | 360.19 | C12H10BrNO5S   |
| AK-968/10821006 | K12 | 1.00  | 1.00 | 1.00  | 0.00 | 0.00  | 0.00 |    | 5-bromo-N-(2,3-dimethylphenyl)-2-furamide                                      | 294.15 | C13H12BrNO2    |
| AN-652/40052606 | K13 | 3.00  | 0.00 | 2.67  | 0.58 | 2.67  | 0.58 |    | 5-bromo-N-(3,4-dichlorophenyl)-2-furamide                                      | 334.99 | C11H6BrCl2NO2  |
| AK-968/09820028 | K14 | 1.33  | 2.08 | 2.33  | 0.58 | 0.67  | 1.15 |    | 5-bromo-N-(4-ethoxyphenyl)-2-furamide                                          | 310.15 | C13H12BrNO3    |
| AK-968/41753487 | K15 | 1.67  | 1.53 | 1.33  | 0.58 | 0.67  | 0.58 |    | 5-bromo-N-(2-ethoxyphenyl)-2-furamide                                          | 310.15 | C13H12BrNO3    |
| AG-690/12764874 | K16 | 0.00  | 0.00 | 0.00  | 0.00 | -0.33 | 0.58 |    | 5-bromo-N-(1,5-dimethyl-3-oxo-2-phenyl-2,3-dihydro-1H-pyrazol-4-yl)-2-furamide | 376.21 | C16H14BrN3O3   |
| AN-652/42568585 | K17 | 1.67  | 0.58 | 0.67  | 0.58 | 1.33  | 1.15 |    | phenyl 5-bromo-2-furoate                                                       | 267.08 | C11H7BrO3      |
| AN-329/40744138 | K18 | 2.67  | 0.58 | 1.67  | 0.58 | 1.67  | 1.53 |    | 5-bromo-N-(2-((5-bromo-2-furoyl)amino)ethyl)-N-phenyl-2-furamide               | 558.23 | C24H18BrN2O4   |
| AN-329/41006856 | K19 | 0.00  | 1.00 | 0.33  | 0.58 | 0.33  | 0.58 |    | N-(4-((2-(5-bromo-2-furoyl)hydrazino)carbonyl)phenyl)cyclohexanecarboxamide    | 434.29 | C19H20BrN3O4   |
| AN-329/40744079 | K20 | 3.00  | 0.00 | 2.67  | 0.58 | 2.33  | 0.58 |    | N-(4-anilinophenyl)-5-bromo-2-furamide                                         | 357.21 | C17H13BrN2O2   |
| AN-329/40744087 | K21 | 2.00  | 1.00 | 1.00  | 0.00 | 1.33  | 0.58 |    | 5-bromo-N-(3-nitro-2-methylphenyl)-2-furamide                                  | 325.12 | C12H9BrN2O4    |
| AN-329/40744134 | K22 | -1.00 | 0.00 | 0.00  | 1.00 | -0.33 | 0.58 |    | 5-bromo-N'-(2-methyl-3-furoyl)-2-furohydrazide                                 | 313.11 | C11H9BrN2O4    |
| AJ-292/11893076 | L03 | 0.33  | 0.58 | 0.33  | 0.58 | 0.67  | 0.58 |    | N-[1-(aminocarbonyl)-2-(1,3-benzodioxol-5-yl)vinyl]-5-bromo-2-furamide         | 379.17 | C15H11BrN2O5   |
| AK-968/10818020 | L04 | 3.00  | 0.00 | 2.33  | 0.58 | 2.33  | 1.15 |   | 5-bromo-N-(2,5-dimethoxyphenyl)-2-furamide                                     | 326.15 | C13H12BrNO4    |
| AG-205/36696043 | L05 | 3.00  | 0.00 | 2.67  | 0.58 | 2.67  | 0.58 |  | 2-oxo-2-phenylethyl 5-bromo-2-furoate                                          | 309.12 | C13H9BrO4      |
| AG-670/12032023 | L06 | 3.00  | 0.00 | 1.67  | 0.58 | 2.00  | 1.00 |  | 5-bromo-N-[4-chloro-3-(5-methyl-1,3-benzoxazol-2-yl)phenyl]-2-furamide         | 431.68 | C19H12BrClN2O3 |
| AO-365/43264264 | L07 | 0.67  | 0.58 | 0.33  | 0.58 | 0.00  | 1.00 |  | N-[2-((5-bromo-2-furoyl)amino)ethyl]-2-pyridinecarboxamide                     | 338.16 | C13H12BrN3O3   |
| AK-968/11369020 | L08 | 3.00  | 0.00 | 2.67  | 0.58 | 2.33  | 1.15 |  | 5-bromo-N-(4-sec-butylphenyl)-2-furamide                                       | 322.20 | C15H16BrNO2    |
| AK-968/11369112 | L09 | 3.00  | 0.00 | 2.00  | 0.00 | 1.67  | 1.53 |  | 5-bromo-N-(4-methylbenzyl)-2-furamide                                          | 294.15 | C13H12BrNO2    |
| AN-652/42568552 | L10 | 3.00  | 0.00 | 1.67  | 0.58 | 2.00  | 1.00 |  | 2-methoxyphenyl 5-bromo-2-furoate                                              | 297.11 | C12H9BrO4      |
| AH-262/08501053 | L11 | 2.00  | 1.00 | 1.67  | 0.58 | 1.33  | 1.53 |  | 4-methylphenyl 5-bromo-2-furoate                                               | 281.11 | C12H9BrO3      |
| AP-970/42683306 | L12 | 3.00  | 0.00 | 2.33  | 0.58 | 2.33  | 0.58 |  | 5-bromo-N-[3-chloro-4-(4-ethyl-1-piperazinyl)phenyl]-2-furamide                | 412.72 | C17H19BrClN3O2 |
| AN-652/40097422 | L13 | 0.00  | 0.00 | 0.00  | 0.00 | -0.33 | 0.58 |  | 5-bromo-N-(2-chloro-3-pyridinyl)-2-furamide                                    | 301.53 | C10H6BrClN2O2  |
| AN-652/40072434 | L14 | 3.00  | 0.00 | 2.33  | 0.58 | 2.33  | 0.58 |  | 5-bromo-N-(8-quinolinyl)-2-furamide                                            | 317.14 | C14H9BrN2O2    |
| AN-652/42568556 | L15 | 3.00  | 0.00 | 2.33  | 0.58 | 3.00  | 0.00 |  | ethyl 3-((5-bromo-2-furoyl)amino)benzoate                                      | 338.16 | C14H12BrNO4    |
| AN-652/40051821 | L16 | 1.67  | 1.53 | 1.67  | 0.58 | 1.67  | 0.58 |  | 5-bromo-N-(4-chlorophenyl)-2-furamide                                          | 300.54 | C11H7BrClNO2   |
| AN-652/05699060 | L17 | 2.67  | 0.58 | 1.33  | 1.15 | 1.67  | 1.53 |  | 5-bromo-N-(4-methylphenyl)-2-furamide                                          | 280.12 | C12H10BrNO2    |
| AN-329/40839978 | L18 | -0.67 | 0.58 | -0.33 | 0.58 | 0.00  | 0.00 |  | 5-bromo-N'-(4-cyanobenzylidene)-2-furohydrazide                                | 318.13 | C13H8BrN3O2    |
| AN-329/40744083 | L19 | 0.00  | 0.00 | 0.00  | 0.00 | -0.33 | 0.58 |  | N-[2-(aminocarbonyl)phenyl]-5-bromo-2-furamide                                 | 309.12 | C12H9BrN2O3    |

|                 |     |       |      |      |      |       |      |                                                                                      |                                                                               |        |                |
|-----------------|-----|-------|------|------|------|-------|------|--------------------------------------------------------------------------------------|-------------------------------------------------------------------------------|--------|----------------|
| AN-329/40254857 | L20 | 0.33  | 0.58 | 1.33 | 0.58 | 0.33  | 0.58 | 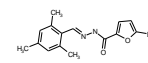   | 5-bromo-N-(mesitylmethylene)-2-furohydrazide                                  | 335.20 | C15H15BrN2O2   |
| AN-329/40254006 | L21 | -0.33 | 0.58 | 0.33 | 0.58 | -0.33 | 0.58 |    | 5-bromo-N-(2-oxo-1,2-dihydro-3H-indol-3-ylidene)-2-furohydrazide              | 334.13 | C13H8BrN3O3    |
| AN-329/40744089 | L22 | 0.33  | 0.58 | 0.67 | 0.58 | 0.00  | 1.00 |    | N-[3-(aminocarbonyl)-4,5,6,7-tetrahydro-1-benzothien-2-yl]-5-bromo-2-furamide | 369.24 | C14H13BrN2O3S  |
| AH-034/32475045 | M03 | 2.00  | 1.73 | 0.33 | 0.58 | 1.00  | 1.73 |    | 4-(benzylamino)-3-nitro-2H-chromen-2-one                                      | 296.29 | C16H12N2O4     |
| AN-329/41830836 | M04 | 3.00  | 0.00 | 0.67 | 0.58 | 2.67  | 0.58 |    | 2,6-dimethylphenyl 5-bromo-2-furoate                                          | 295.13 | C13H11BrO3     |
| AO-365/43402738 | M05 | 3.00  | 0.00 | 2.67 | 0.58 | 2.67  | 0.58 |    | 5-bromo-N-[2-((2-(diethylamino)ethylamino)carbonyl)phenyl]-2-furamide         | 408.30 | C18H22BrN3O3   |
| AK-778/11811017 | M06 | 0.33  | 0.58 | 0.67 | 0.58 | -0.33 | 0.58 |    | 5-bromo-N-[2-(5-bromo-2-chlorophenyl)-1,3-benzoxazol-5-yl]-2-furamide         | 496.55 | C18H9Br2ClN2O3 |
| AN-329/11658808 | M07 | 0.67  | 0.58 | 0.67 | 0.58 | 0.67  | 0.58 |    | 5-bromo-N-(2-thienylcarbonyl)-2-furohydrazide                                 | 315.15 | C10H7BrN2O3S   |
| AN-329/43449025 | M08 | 1.00  | 1.73 | 0.33 | 0.58 | 0.00  | 0.00 |    | 5-bromo-N-[3-(4-morpholinylcarbonyl)phenyl]-2-furamide                        | 379.21 | C16H15BrN2O4   |
| AG-670/42111674 | M09 | 3.00  | 0.00 | 2.33 | 0.58 | 2.67  | 0.58 |    | 5-bromo-N-[4-(isobutylamino)-3-methoxyphenyl]-2-furamide                      | 381.23 | C16H17BrN2O4   |
| AN-329/43449686 | M10 | 0.00  | 0.00 | 0.33 | 0.58 | -0.33 | 0.58 |    | 4-(propionylamino)phenyl 5-bromo-2-furoate                                    | 338.16 | C14H12BrNO4    |
| AF-399/40769063 | M11 | -0.33 | 0.58 | 0.33 | 0.58 | 0.00  | 1.00 |    | N-(2-((2-(5-bromo-2-furyl)methylene)hydrazino)-2-oxoethyl)benzamide           | 350.17 | C14H12BrN3O3   |
| AN-329/43448985 | M12 | 1.00  | 1.73 | 0.33 | 0.58 | 0.33  | 0.58 |    | 5-bromo-N-[3-((isopropylamino)carbonyl)phenyl]-2-furamide                     | 351.20 | C15H15BrN2O3   |
| AK-968/40605757 | M13 | 3.00  | 0.00 | 1.67 | 0.58 | 1.33  | 1.53 |   | 5-bromo-N-(1-phenylpentylidene)-2-furohydrazide                               | 349.23 | C16H17BrN2O2   |
| AK-968/41924375 | M14 | 0.00  | 0.00 | 0.67 | 1.15 | 0.00  | 1.00 |  | N-benzyl-2-(5-bromo-2-furoyl)hydrazinecarbothioamide                          | 354.23 | C13H12BrN3O2S  |
| AG-690/10280046 | M15 | 0.00  | 0.00 | 0.33 | 0.58 | 1.67  | 1.15 |  | 5-bromo-N-[3-(4-methoxyanilino)carbonyl]phenyl]-2-furamide                    | 415.25 | C19H15BrN2O4   |
| AN-652/05699057 | M16 | 1.67  | 0.58 | 1.67 | 0.58 | 2.00  | 1.00 |  | 5-bromo-N-(4-bromophenyl)-2-furamide                                          | 344.99 | C11H7Br2NO2    |
| AN-652/34351048 | M17 | 0.67  | 0.58 | 1.00 | 0.00 | 0.00  | 1.00 |  | 3-methylphenyl 5-bromo-2-furoate                                              | 281.11 | C12H9BrO3      |
| AN-329/41558674 | M18 | -1.00 | 0.00 | 0.00 | 0.00 | -0.33 | 0.58 |  | 5-bromo-N-((4-bromo-2-methylphenoxy)acetyl)-2-furohydrazide                   | 432.07 | C14H12Br2N2O4  |
| AN-329/41306889 | M19 | 1.33  | 1.53 | 0.67 | 1.15 | 0.33  | 0.58 |  | 2-nitrophenyl 5-bromo-2-furoate                                               | 312.08 | C11H6BrNO5     |
| AN-329/41306942 | M20 | -0.33 | 0.58 | 0.33 | 0.58 | 0.00  | 1.00 |  | 2-chlorophenyl 5-bromo-2-furoate                                              | 301.53 | C11H6BrClO3    |
| AN-329/40256100 | M21 | 2.67  | 0.58 | 2.33 | 0.58 | 1.33  | 0.58 |  | N'-(9-anthylmethylene)-5-bromo-2-furohydrazide                                | 393.24 | C20H13BrN2O2   |
| AN-329/40287114 | M22 | 0.33  | 1.15 | 1.33 | 0.58 | 1.00  | 1.00 |  | 5-bromo-N-[2-((5-bromo-2-furoyl)amino)ethyl]-2-furamide                       | 406.03 | C12H10Br2N2O4  |
| AO-081/41933654 | N03 | 3.00  | 0.00 | 2.00 | 0.00 | 2.33  | 1.15 |  | 1-(5-bromo-2-furoyl)-4-(2-pyridinyl)piperazine                                | 336.19 | C14H14BrN3O2   |
| AK-968/37005249 | N04 | 3.00  | 0.00 | 0.67 | 1.53 | 2.00  | 1.73 |  | 5-bromo-N'-(1-(4-methoxyphenyl)ethylidene)-2-furohydrazide                    | 337.18 | C14H13BrN2O3   |
| AO-365/43403333 | N05 | 3.00  | 0.00 | 3.00 | 0.00 | 3.00  | 0.00 |  | N-[2-((5-bromo-2-furoyl)amino)ethyl]-1-benzofuran-2-carboxamide               | 377.20 | C16H13BrN2O4   |
| AO-365/43402633 | N06 | 3.00  | 0.00 | 2.33 | 0.58 | 2.33  | 1.15 |  | 5-bromo-N-(((3-(4-morpholinyl)propylamino)carbonyl)phenyl)-2-furamide         | 436.31 | C19H22BrN3O4   |
| AK-968/41026852 | N07 | 1.00  | 1.73 | 0.00 | 0.00 | 0.00  | 1.00 |  | 5-[2-(5-bromo-2-furoyl)hydrazino]-5-oxopentanoic acid                         | 319.11 | C10H11BrN2O5   |
| AN-329/43448963 | N08 | 3.00  | 0.00 | 2.00 | 0.00 | 2.00  | 1.00 |  | 5-bromo-N-[3-(sec-butylamino)carbonyl]phenyl]-2-furamide                      | 365.23 | C16H17BrN2O3   |
| AG-670/42112028 | N09 | 0.67  | 0.58 | 1.33 | 0.58 | 0.67  | 0.58 |  | N-[4-(4-benzyl-1-piperazinyl)phenyl]-5-bromo-2-furamide                       | 440.34 | C22H22BrN3O2   |

|                 |     |       |      |      |      |       |      |                                                                                     |                                                                                       |        |                |
|-----------------|-----|-------|------|------|------|-------|------|-------------------------------------------------------------------------------------|---------------------------------------------------------------------------------------|--------|----------------|
| AK-968/1136890  | N10 | 3.00  | 0.00 | 2.33 | 0.58 | 2.33  | 0.58 | 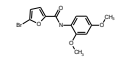   | 5-bromo-N-(2,4-dimethoxyphenyl)-2-furamide                                            | 326.15 | C13H12BrNO4    |
| AK-968/1136900  | N11 | 3.00  | 0.00 | 2.33 | 0.58 | 2.67  | 0.58 |    | 5-bromo-N-(4-phenylbutyl)-2-furamide                                                  | 322.20 | C15H16BrNO2    |
| AN-329/42613149 | N12 | 3.00  | 0.00 | 2.33 | 0.58 | 2.67  | 0.58 |    | 5-bromo-N-(4-((methylamino)sulfonyl)phenyl)-2-furamide                                | 435.30 | C18H15BrN2O4S  |
| AK-968/41924353 | N13 | -0.33 | 0.58 | 0.00 | 0.00 | 1.00  | 1.00 |    | 2-(5-bromo-2-furoyl)-N-(2-methylphenyl)hydrazinecarbothioamide                        | 354.23 | C13H12BrN3O2S  |
| AK-968/41924264 | N14 | -0.67 | 0.58 | 0.00 | 0.00 | -0.33 | 0.58 |    | N-allyl-2-(5-bromo-2-furoyl)hydrazinecarbothioamide                                   | 304.17 | C9H10BrN3O2S   |
| AN-652/09829029 | N15 | 3.00  | 0.00 | 2.33 | 0.58 | 2.00  | 1.00 |    | 5-bromo-N-(9-ethyl-9H-carbazol-3-yl)-2-furamide                                       | 383.25 | C19H15BrN2O2   |
| AN-652/42568554 | N16 | 3.00  | 0.00 | 2.33 | 0.58 | 1.67  | 1.53 |    | 3-tert-butyl-4-hydroxyphenyl 5-bromo-2-furoate                                        | 339.19 | C15H15BrO4     |
| AG-690/12886226 | N17 | 3.00  | 0.00 | 2.33 | 0.58 | 2.33  | 0.58 |    | ethyl 4-((5-bromo-2-furoyl)amino)benzoate                                             | 338.16 | C14H12BrNO4    |
| AN-329/40839974 | N18 | 2.33  | 1.15 | 1.33 | 0.58 | 1.00  | 0.00 |    | 5-bromo-N'-(9-ethyl-9H-carbazol-3-yl)methylene)-2-furohydrazide                       | 410.27 | C20H16BrN3O2   |
| AN-329/40839980 | N19 | 3.00  | 0.00 | 1.33 | 1.53 | 1.33  | 1.53 |    | 5-bromo-N'-(3,5-dichloro-2-hydroxybenzylidene)-2-furohydrazide                        | 378.01 | C12H7BrCl2N2O3 |
| AN-329/40744111 | N20 | -0.67 | 0.58 | 0.00 | 1.00 | -0.33 | 0.58 |    | 5-bromo-N'-(4-methoxyphenyl)acetyl)-2-furohydrazide                                   | 353.17 | C14H13BrN2O4   |
| AN-329/40744084 | N21 | 2.00  | 1.73 | 1.00 | 0.00 | -0.33 | 0.58 |    | N-[2-(anilinoacetyl)phenyl]-5-bromo-2-furamide                                        | 385.22 | C18H13BrN2O3   |
| AN-329/40744088 | N22 | 3.00  | 0.00 | 1.33 | 0.58 | 0.33  | 0.58 |    | methyl 2-((5-bromo-2-furoyl)amino)-4,5,6,7-tetrahydro-1-benzothioephene-3-carboxylate | 384.25 | C15H14BrNO4S   |
| AK-968/37005293 | O03 | 0.00  | 0.00 | 0.00 | 0.00 | 0.33  | 0.58 |   | 5-bromo-N'-(2-hydroxy-3-methoxybenzylidene)-2-furohydrazide                           | 339.15 | C13H11BrN2O4   |
| AK-968/37005214 | O04 | 3.00  | 0.00 | 0.67 | 1.53 | 1.00  | 1.00 |  | 5-bromo-N'-(4-methylcyclohexylidene)-2-furohydrazide                                  | 299.17 | C12H15BrN2O2   |
| AN-329/43449026 | O05 | 3.00  | 0.00 | 2.33 | 0.58 | 2.33  | 1.15 |  | 5-bromo-N'-(3-((diethylamino)carbonyl)phenyl)-2-furamide                              | 365.23 | C16H17BrN2O3   |
| AO-365/43402993 | O06 | 3.00  | 0.00 | 2.33 | 0.58 | 2.67  | 0.58 |  | 5-bromo-N'-(2-(((2-(dimethylamino)ethyl)amino)carbonyl)phenyl)-2-furamide             | 380.24 | C16H18BrN3O3   |
| AK-968/11987233 | O07 | 3.00  | 0.00 | 2.33 | 0.58 | 2.67  | 0.58 |  | 1-(5-bromo-2-furoyl)-4-(4-chlorophenyl)piperazine                                     | 369.65 | C15H14BrClN2O2 |
| AN-329/43448928 | O08 | 0.67  | 1.15 | 1.33 | 0.58 | 0.00  | 0.00 |  | 5-bromo-N-(4-((3-methylbutanoyl)amino)phenyl)-2-furamide                              | 365.23 | C16H17BrN2O3   |
| AN-329/43449021 | O09 | 3.00  | 0.00 | 2.33 | 0.58 | 2.67  | 0.58 |  | 5-bromo-N-(3-(((2-furylmethyl)amino)carbonyl)phenyl)-2-furamide                       | 389.21 | C17H13BrN2O4   |
| AN-329/05699054 | O10 | 1.67  | 1.15 | 1.00 | 0.00 | 1.33  | 1.53 |  | 4-methoxyphenyl 5-bromo-2-furoate                                                     | 297.11 | C12H9BrO4      |
| AK-918/12440572 | O11 | 3.00  | 0.00 | 2.33 | 0.58 | 2.67  | 0.58 |  | 3-((3-methoxybenzoyl)amino)phenyl 5-bromo-2-furoate                                   | 416.23 | C19H14BrNO5    |
| AK-968/14003142 | O12 | 3.00  | 0.00 | 2.33 | 0.58 | 2.33  | 0.58 |  | 5-bromo-N-(2,3-dihydro-1H-inden-5-yl)-2-furamide                                      | 306.16 | C14H12BrNO2    |
| AK-968/41927440 | O13 | 3.00  | 0.00 | 2.33 | 0.58 | 2.33  | 0.58 |  | 5-bromo-N-(2-phenoxyphenyl)-2-furamide                                                | 358.19 | C17H12BrNO3    |
| AK-968/41922148 | O14 | 2.67  | 0.58 | 1.33 | 0.58 | 2.33  | 0.58 |  | 5-bromo-N'-(2-(4-chlorophenoxy)-2-methylpropanoyl)-2-furohydrazide                    | 401.65 | C15H14BrClN2O4 |
| AK-968/40307670 | O15 | 3.00  | 0.00 | 2.33 | 0.58 | 2.33  | 0.58 |  | 5-bromo-N'-(5-ethyl-2-thienyl)methylene)-2-furohydrazide                              | 327.20 | C12H11BrN2O2S  |
| AK-968/11368442 | O16 | 0.00  | 0.00 | 0.00 | 0.00 | -0.33 | 0.58 |  | 5-bromo-N'-(1,2-dimethylpropylidene)-2-furohydrazide                                  | 273.13 | C10H13BrN2O2   |
| AK-968/40386583 | O17 | 2.00  | 1.00 | 0.67 | 0.58 | 1.67  | 0.58 |  | 5-bromo-N'-(3-cyclohexen-1-yl)methylene)-2-furohydrazide                              | 297.15 | C12H13BrN2O2   |
| AN-329/43385616 | O18 | 1.00  | 1.00 | 1.67 | 0.58 | 1.00  | 1.00 |  | 5-bromo-N-(4-propoxyphenyl)-2-furamide                                                | 324.18 | C14H14BrNO3    |
| AN-329/33948023 | O19 | 3.00  | 0.00 | 1.67 | 0.58 | 2.00  | 1.00 |  | 5-bromo-N-(3,4-dimethylphenyl)-2-furamide                                             | 294.15 | C13H12BrNO2    |

|                 |     |       |      |       |      |       |      |                                                                                     |                                                                                                |        |                |
|-----------------|-----|-------|------|-------|------|-------|------|-------------------------------------------------------------------------------------|------------------------------------------------------------------------------------------------|--------|----------------|
| AG-690/33916063 | O20 | 1.67  | 1.53 | 1.67  | 0.58 | 1.33  | 1.15 |    | 5-bromo-N-[2-((5-bromo-2-furoyl)amino)phenyl]-2-furamide                                       | 454.08 | C16H10Br2N2O4  |
| AN-329/12864804 | O21 | 3.00  | 0.00 | 2.33  | 0.58 | 2.33  | 1.15 |    | 5-bromo-N-mesityl-2-furamide                                                                   | 308.18 | C14H14BrNO2    |
| AN-329/40744086 | O22 | -0.67 | 0.58 | 0.67  | 0.58 | -0.67 | 0.58 |    | 5-bromo-N-[5-nitro-2-methoxyphenyl]-2-furamide                                                 | 341.12 | C12H9BrN2O5    |
| AN-329/40744092 | P03 | 2.33  | 1.15 | 1.00  | 1.73 | 1.00  | 1.73 |    | 5-bromo-N-[4-(1-piperidinylsulfonyl)phenyl]-2-furamide                                         | 413.29 | C16H17BrN2O4S  |
| AK-968/11367284 | P04 | 1.67  | 1.15 | 0.00  | 1.00 | 0.67  | 0.58 |    | 5-bromo-N'-cycloheptylidene-2-furohydrazide                                                    | 299.17 | C12H15BrN2O2   |
| AN-329/43450127 | P05 | 3.00  | 0.00 | 2.00  | 1.00 | 2.67  | 0.58 |    | N-[2-(allyloxy)phenyl]-5-bromo-2-furamide                                                      | 322.16 | C14H12BrNO3    |
| AG-670/13188026 | P06 | 0.00  | 0.00 | 0.00  | 0.00 | -0.33 | 0.58 |    | 5-bromo-N-[2-(4-bromophenyl)-2H-1,2,3-benzotriazol-5-yl]-2-furamide                            | 462.10 | C17H10Br2N4O2  |
| AG-690/11571991 | P07 | 0.00  | 0.00 | 0.67  | 0.58 | 0.00  | 0.00 |    | 1-(5-bromo-2-furoyl)-3,5-bis(4-bromophenyl)-4,5-dihydro-1H-pyrazole                            | 553.05 | C20H13Br3N2O2  |
| AN-329/43449024 | P08 | 3.00  | 0.00 | 2.00  | 1.00 | 1.67  | 0.58 |    | N-[4-(1-azepanylcarbonyl)phenyl]-5-bromo-2-furamide                                            | 391.27 | C18H19BrN2O3   |
| AN-329/43449028 | P09 | 2.67  | 0.58 | 2.00  | 1.00 | 1.67  | 0.58 |    | 5-bromo-N-[4-[(diethylamino)carbonyl]phenyl]-2-furamide                                        | 365.23 | C16H17BrN2O3   |
| AN-329/43450214 | P10 | 3.00  | 0.00 | 2.00  | 1.00 | 2.33  | 1.15 |    | 5-bromo-N-(2-isopropoxyphenyl)-2-furamide                                                      | 324.18 | C14H14BrNO3    |
| AN-329/43449645 | P11 | 3.00  | 0.00 | 1.67  | 0.58 | 2.00  | 1.00 |    | 5-bromo-N-(2-butoxyphenyl)-2-furamide                                                          | 338.20 | C15H16BrNO3    |
| AG-690/12763583 | P12 | 0.33  | 0.58 | 0.00  | 0.00 | -0.33 | 0.58 |    | 5-bromo-N-(3-pyridinylmethyl)-2-furamide                                                       | 281.11 | C11H9BrN2O2    |
| AK-968/41923758 | P13 | -1.00 | 0.00 | 0.00  | 0.00 | -0.33 | 0.58 |   | 2-(5-bromo-2-furoyl)-N-isobutylhydrazinecarbothioamide                                         | 320.21 | C10H14BrN3O2S  |
| AG-205/07808008 | P14 | 3.00  | 0.00 | 1.33  | 1.15 | 1.67  | 1.53 |  | 5-bromo-N-[2-chloro-5-(trifluoromethyl)phenyl]-2-furamide                                      | 368.54 | C12H6BrClF3NO2 |
| AK-968/11367377 | P15 | 3.00  | 0.00 | 1.67  | 0.58 | 2.33  | 0.58 |  | N'-(bicyclo[2.2.1]hept-2-ylmethylene)-5-bromo-2-furohydrazide                                  | 311.18 | C13H15BrN2O2   |
| AK-968/12122023 | P16 | 0.67  | 0.58 | 0.00  | 0.00 | 0.00  | 0.00 |  | 5-bromo-N-butyl-2-furamide                                                                     | 246.11 | C9H12BrNO2     |
| AK-968/40279810 | P17 | 0.33  | 0.58 | 0.33  | 0.58 | 0.67  | 0.58 |  | 5-bromo-N'-(1-isopropyl-4-piperidinylidene)-2-furohydrazide                                    | 328.21 | C13H18BrN3O2   |
| AN-329/10830053 | P18 | 0.33  | 0.58 | 0.33  | 0.58 | -0.33 | 0.58 |  | N-[4-(aminocarbonyl)phenyl]-5-bromo-2-furamide                                                 | 309.12 | C12H9BrN2O3    |
| AN-329/09830049 | P19 | -0.67 | 0.58 | -0.67 | 0.58 | -0.33 | 0.58 |  | 5-bromo-N'-(3-nitrobenzoyl)-2-furohydrazide                                                    | 354.12 | C12H8BrN3O5    |
| AK-968/11368956 | P20 | 0.00  | 0.00 | 1.00  | 1.00 | 1.33  | 1.53 |  | N'-(4-(benzyloxy)benzylidene)-5-bromo-2-furohydrazide                                          | 399.25 | C19H15BrN2O3   |
| AN-329/12974430 | P21 | 3.00  | 0.00 | 2.33  | 0.58 | 2.33  | 0.58 |  | propyl 4-[(5-bromo-2-furoyl)amino]benzoate                                                     | 352.19 | C15H14BrNO4    |
| AN-329/40744124 | P22 | -1.00 | 0.00 | -0.33 | 0.58 | 0.00  | 0.00 |  | N-benzyl-4-[2-(5-bromo-2-furoyl)hydrazino]-4-oxobutanamide                                     | 394.23 | C16H16BrN3O4   |
| AE-641/30156032 | A03 | 3.00  | 0.00 | 2.00  | 1.00 | 2.67  | 0.58 |  | 8-(2-[(diphenylacetyl)oxy]ethyl)-2-isopropyl-8-methyl-1,3-dioxo-2-aza-8-azoniaspiro[4.5]decane | 463.60 | C28H35N2O4     |
| AA-516/30054006 | A04 | 0.33  | 0.58 | 0.67  | 0.58 | 0.00  | 0.00 |  | methyl 5-bromo-2-furoate                                                                       | 205.01 | C6H5BrO3       |
| AK-968/41728420 | A05 | 0.00  | 1.00 | 0.67  | 0.58 | 0.33  | 0.58 |  | 5-bromo-N-(6-chloro-1,3-benzothiazol-2-yl)-2-furamide                                          | 357.61 | C12H6BrClN2O2S |
| AE-641/30177001 | A07 | 3.00  | 0.00 | 2.33  | 0.58 | 2.67  | 0.58 |  | N,N,4-trimethyl-5,6-diphenyl-1-hexanamine                                                      | 295.47 | C21H29N        |
| AN-329/41933649 | B03 | 3.00  | 0.00 | 1.33  | 0.58 | 2.67  | 0.58 |  | 5-bromo-N-methyl-N-phenyl-2-furamide                                                           | 280.12 | C12H10BrNO2    |
| AN-329/42667829 | B04 | 3.00  | 0.00 | 0.67  | 0.58 | 0.00  | 0.00 |  | N-(5-bromo-2-furoyl)-N'-(2-ethoxyphenyl)thiourea                                               | 369.24 | C14H13BrN2O3S  |
| AK-968/41925804 | B05 | 1.33  | 1.15 | 0.67  | 0.58 | 0.67  | 0.58 |  | 5-bromo-N-(5-methyl-2-pyridinyl)-2-furamide                                                    | 281.11 | C11H9BrN2O2    |

|                 |     |       |      |      |      |      |      |                                                                                     |                                                                                             |        |                 |
|-----------------|-----|-------|------|------|------|------|------|-------------------------------------------------------------------------------------|---------------------------------------------------------------------------------------------|--------|-----------------|
| AQ-776/42801681 | B07 | 1.33  | 1.53 | 0.67 | 0.58 | 0.67 | 1.15 | 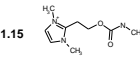   | 2-(1,3-dimethyl-1H-imidazol-3-ium-2-yl)ethyl methylcarbamate                                | 198.25 | C9H16N3O2       |
| AN-329/42581112 | C03 | 3.00  | 0.00 | 1.67 | 0.58 | 2.33 | 0.58 |    | N-(5-bromo-2-furoyl)-N-methyl-N-phenylthiourea                                              | 339.21 | C13H11BrN2O2S   |
| AK-918/42409778 | C04 | 3.00  | 0.00 | 0.33 | 0.58 | 0.00 | 0.00 |    | 2,6-dichlorobenzyl 5-bromo-2-furoate                                                        | 350.00 | C12H7BrCl2O3    |
| AK-968/41925801 | C05 | 3.00  | 0.00 | 1.67 | 1.53 | 3.00 | 0.00 |    | 5-bromo-N-[2-(3-chlorophenyl)ethyl]-2-furamide                                              | 328.60 | C13H11BrClNO2   |
| AG-690/15427908 | C07 | 3.00  | 0.00 | 2.00 | 1.00 | 2.67 | 0.58 |    | 4-[(1-adamantylcarbonyloxy)-N,N,N-trimethyl-1-butanaminium                                  | 294.46 | C18H32NO2       |
| AN-979/42723369 | D03 | 2.33  | 1.15 | 1.33 | 1.53 | 1.67 | 1.15 |    | 5-bromo-N-[3-[5-(4-methylphenyl)-1,3,4-oxadiazol-2-yl]phenyl]-2-furamide                    | 424.26 | C20H14BrN3O3    |
| AN-652/41072564 | D04 | 3.00  | 0.00 | 2.00 | 1.00 | 1.67 | 1.53 |    | 5-bromo-N-[4-chloro-2-(trifluoromethyl)phenyl]-2-furamide                                   | 368.54 | C12H6BrClF3NO2  |
| AP-970/43375149 | D05 | 1.33  | 1.53 | 0.00 | 0.00 | 0.67 | 1.15 |    | methyl 3-[(5-bromo-2-furoyl)amino]-4-(4-morpholinyl)benzoate                                | 409.24 | C17H17BrN2O5    |
| AE-473/30080042 | D07 | 2.67  | 0.58 | 1.33 | 0.58 | 1.67 | 0.58 |    | 2-[(5-nitro-2-methylphenyl)imino]-1-methylpyrrolidine                                       | 233.27 | C12H15N3O2      |
| AH-034/07270029 | E03 | -0.33 | 0.58 | 0.00 | 0.00 | 1.00 | 0.00 |    | 5-bromo-N-(6-methyl-1,3-benzothiazol-2-yl)-2-furamide                                       | 337.20 | C13H9BrN2O2S    |
| AN-329/42295052 | E04 | 0.00  | 1.00 | 0.00 | 0.00 | 1.00 | 0.00 |    | N-(5-bromo-2-furoyl)-N'-(2,3-dichlorophenyl)thiourea                                        | 394.08 | C12H7BrCl2N2O2S |
| AN-329/41689899 | E05 | 3.00  | 0.00 | 2.67 | 0.58 | 2.33 | 0.58 |    | 2-acetylphenyl 5-bromo-2-furoate                                                            | 309.12 | C13H9BrO4       |
| AG-664/42183910 | E07 | 3.00  | 0.00 | 2.00 | 1.00 | 2.00 | 1.00 |    | N-(3-chlorophenyl)-2-[(4-chlorophenyl)imino]-1-pyrrolidinecarboxamide                       | 348.23 | C17H15Cl2N3O    |
| AK-968/41925901 | F03 | 2.33  | 1.15 | 0.00 | 0.00 | 0.33 | 0.58 |   | methyl 2-[(5-bromo-2-furoyl)amino]-4,5,6,7,8,9-hexahydrocycloocta[b]thiophene-3-carboxylate | 412.31 | C17H18BrNO4S    |
| AN-329/42344165 | F04 | 3.00  | 0.00 | 1.67 | 0.58 | 1.33 | 0.58 |  | 2-(5-bromo-2-furyl)-5-phenyl-1,3,4-oxadiazole                                               | 291.11 | C12H7BrN2O2     |
| AN-329/42548417 | F05 | 3.00  | 0.00 | 2.00 | 1.00 | 2.67 | 0.58 |  | 5-bromo-N-[4-[(4-methyl-1-piperazinyl)sulfonyl]phenyl]-2-furamide                           | 428.31 | C16H18BrN3O4S   |
| AQ-776/42801680 | F07 | 2.67  | 0.58 | 1.33 | 0.58 | 1.00 | 1.00 |  | 2-(1,3-dimethyl-1H-imidazol-3-ium-2-yl)ethyl dimethylcarbamate                              | 212.27 | C10H18N3O2      |
| AN-652/42568584 | G03 | 3.00  | 0.00 | 0.00 | 0.00 | 1.00 | 1.00 |  | 2,4-dibromophenyl 5-bromo-2-furoate                                                         | 424.87 | C11H5Br3O3      |
| AN-652/40051836 | G04 | 3.00  | 0.00 | 1.67 | 1.15 | 1.67 | 0.58 |  | 5-bromo-N-(2,3-dichlorophenyl)-2-furamide                                                   | 334.99 | C11H6BrCl2NO2   |
| AK-968/41925309 | G05 | 3.00  | 0.00 | 2.00 | 1.00 | 2.33 | 1.15 |  | 5-bromo-N-(3,4-dichlorobenzyl)-2-furamide                                                   | 349.01 | C12H8BrCl2NO2   |
| AG-664/42183909 | G07 | 3.00  | 0.00 | 2.00 | 1.00 | 2.67 | 0.58 |  | N-(4-chlorophenyl)-N-[1-(4-fluorobenzoyl)-2-pyrrolidinydene]amine                           | 316.77 | C17H14ClFN2O    |
| AK-968/12865274 | H03 | 1.00  | 1.73 | 1.33 | 1.53 | 2.33 | 0.58 |  | 5-bromo-N-[3-nitro-4-methylphenyl]-2-furamide                                               | 325.12 | C12H9BrN2O4     |
| AK-968/41753492 | H04 | 2.33  | 0.58 | 1.33 | 1.15 | 2.00 | 1.00 |  | 5-bromo-N-(4,5-dimethyl-1,3-thiazol-2-yl)-2-furamide                                        | 301.16 | C10H9BrN2O2S    |
| AN-652/41482755 | H05 | 2.00  | 1.00 | 1.67 | 0.58 | 2.33 | 0.58 |  | N-(2-benzoyl-4-chlorophenyl)-5-bromo-2-furamide                                             | 404.65 | C18H11BrClNO3   |
| AK-968/41927264 | I03 | 3.00  | 0.00 | 2.00 | 1.00 | 3.00 | 0.00 |  | 5-bromo-N-(1-methyl-3-phenylpropyl)-2-furamide                                              | 322.20 | C15H16BrNO2     |
| AN-329/41574537 | I04 | 0.67  | 0.58 | 0.67 | 0.58 | 0.67 | 0.58 |  | N-(5-bromo-2-furoyl)-N'-(2,5-dimethoxyphenyl)thiourea                                       | 385.24 | C14H13BrN2O4S   |
| AP-970/43268313 | I05 | 3.00  | 0.00 | 2.00 | 1.00 | 3.00 | 0.00 |  | methyl 3-[(5-bromo-2-furoyl)amino]-4-(4-methyl-1-piperazinyl)benzoate                       | 422.28 | C18H20BrN3O4    |
| AQ-776/42801591 | I07 | 2.00  | 1.00 | 1.67 | 1.15 | 1.33 | 0.58 |  | 3-(1,3-dimethyl-1H-imidazol-3-ium-2-yl)propyl dimethylcarbamate                             | 226.30 | C11H20N3O2      |
| AN-465/14962022 | J03 | 2.67  | 0.58 | 1.00 | 1.73 | 1.33 | 1.15 |  | 5-bromo-N-(5-methyl-2,1,3-benzothiadiazol-4-yl)-2-furamide                                  | 338.18 | C12H8BrN3O2S    |
| AP-970/43375832 | J04 | 3.00  | 0.00 | 1.33 | 0.58 | 2.00 | 1.00 |  | N-[2-(4-acetyl-1-piperazinyl)phenyl]-5-bromo-2-furamide                                     | 392.26 | C17H18BrN3O3    |



Antagonist Screen of the human Nicotinic Acetylcholine Receptor (α3b4, α3b4a5, and α3b4a5 D398N)  
 Specs Chemicals Directed Library 1-27-2014  
 Duke University/NIDA P30 Center of Excellence

Contact: L. Barak, C Ray, or M. Caron 919-684-6245 (6606) (5433)

|                 |     |       |      |       |      |      |      |                                                                                     |                                                                                      |        |                 |
|-----------------|-----|-------|------|-------|------|------|------|-------------------------------------------------------------------------------------|--------------------------------------------------------------------------------------|--------|-----------------|
| AN-465/42769709 | J05 | 0.33  | 0.58 | 0.33  | 0.58 | 0.67 | 0.58 |    | 5-bromo-N-(4-chloro-1,3-benzothiazol-2-yl)-2-furamide                                | 357.61 | C12H6BrClN2O2S  |
| AK-968/10831035 | K03 | 3.00  | 0.00 | 1.67  | 1.53 | 1.00 | 1.73 |    | 5-bromo-N-(2-methoxy-5-methylphenyl)-2-furamide                                      | 310.15 | C13H12BrNO3     |
| AK-968/41925681 | K04 | 0.00  | 1.00 | 0.00  | 0.00 | 0.33 | 0.58 |    | 5-bromo-N-(5-nitro-2-pyridinyl)-2-furamide                                           | 312.08 | C10H6BrN3O4     |
| AN-329/41340294 | K05 | 3.00  | 0.00 | 1.00  | 1.73 | 1.00 | 1.00 |    | N-(5-bromo-2-furoyl)-N'-(2-methoxyphenyl)thiourea                                    | 355.21 | C13H11BrN2O3S   |
| AQ-344/43100284 | K07 | 3.00  | 0.00 | 1.67  | 0.58 | 2.67 | 0.58 |    | 2,3-diphenyl-1,2,3,3a,4,9b-hexahydrochromeno[4,3-b]pyrrole                           | 327.43 | C23H21NO        |
| AN-329/42607833 | L03 | 0.00  | 1.00 | 0.33  | 0.58 | 1.00 | 0.00 |    | methyl 2-(((5-bromo-2-furoyl)amino)carbothioyl)amino)benzoate                        | 383.22 | C14H11BrN2O4S   |
| AN-329/42504596 | L04 | 0.00  | 1.00 | 0.33  | 0.58 | 0.00 | 0.00 |    | 5-bromo-N-((4-methyl-1-piperazinyl)carbothioyl)-2-furamide                           | 332.22 | C11H14BrN3O2S   |
| AK-968/41925615 | L05 | 3.00  | 0.00 | 2.00  | 1.00 | 2.67 | 0.58 |    | 1-(5-bromo-2-furoyl)-4-(3-(trifluoromethyl)phenyl)piperazine                         | 403.20 | C16H14BrF3N2O2  |
| AE-641/30115025 | M03 | 3.00  | 0.00 | 1.67  | 1.15 | 2.67 | 0.58 |    | 1-[2-(acetyloxyethyl)-4-[4,4-bis(4-fluorophenyl)butyl]-1,4-dimethylpiperazinedium    | 446.59 | C26H36F2N2O2    |
| AA-516/31409048 | M04 | 3.00  | 0.00 | 0.00  | 0.00 | 0.33 | 0.58 |    | 4-chloro-2-iodo-3,5-dimethylphenyl 5-bromo-2-furoate                                 | 455.48 | C13H9BrClIO3    |
| AK-968/11369181 | M05 | -0.33 | 0.58 | 0.00  | 0.00 | 0.33 | 0.58 |    | 5-bromo-N-(tetrahydro-2-furanylmethyl)-2-furamide                                    | 274.12 | C10H12BrNO3     |
| AE-848/31926026 | M07 | 3.00  | 0.00 | 1.33  | 0.58 | 2.67 | 0.58 |    | N-[2-(dimethylamino)-4-quinolinyl]-N-(1-methyl-2-pyrrolidinyl)amine                  | 268.36 | C16H20N4        |
| AK-918/40864607 | N03 | 3.00  | 0.00 | -0.33 | 0.58 | 0.67 | 0.58 |    | 4-benzylphenyl 5-bromo-2-furoate                                                     | 357.21 | C18H13BrO3      |
| AK-918/41945284 | N04 | 3.00  | 0.00 | 2.00  | 1.00 | 2.33 | 1.15 |   | 4-chlorobenzyl 5-bromo-2-furoate                                                     | 315.55 | C12H8BrClO3     |
| AQ-390/40898049 | O03 | 3.00  | 0.00 | 2.33  | 0.58 | 2.33 | 1.15 |  | N-[3-(1,3-benzothiazol-2-ylsulfanyl)-4-hydroxyphenyl]-2,5-dichlorobenzenesulfonamide | 483.42 | C19H12Cl2N2O3S3 |
| AP-970/42252102 | O04 | 3.00  | 0.00 | 0.33  | 0.58 | 0.33 | 0.58 |  | 5-bromo-N-[6-methyl-2-(1-naphthyl)-2H-1,2,3-benzotriazol-5-yl]-2-furamide            | 447.29 | C22H15BrN4O2    |
| AH-262/36795022 | O07 | 3.00  | 0.00 | 1.67  | 1.15 | 2.33 | 1.15 |  | N-(3,4-dihydro-2(1H)-quinolinylidene)-N-(4-methylphenyl)amine                        | 236.32 | C16H16N2        |
| AN-329/41921591 | P03 | 3.00  | 0.00 | 0.67  | 1.15 | 2.67 | 0.58 |  | 5-bromo-N-[4-[(ethylamino)sulfonyl]phenyl]-2-furamide                                | 449.33 | C19H17BrN2O4S   |
| AN-329/41574560 | P04 | 3.00  | 0.00 | 0.33  | 0.58 | 1.00 | 1.00 |  | N-(5-bromo-2-furoyl)-N'-[2-(1-cyclohexen-1-yl)ethyl]thiourea                         | 357.27 | C14H17BrN2O2S   |

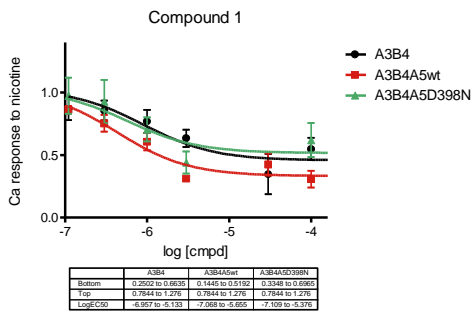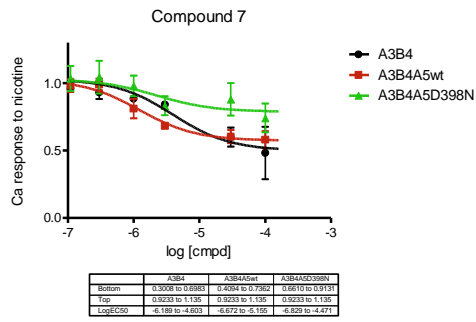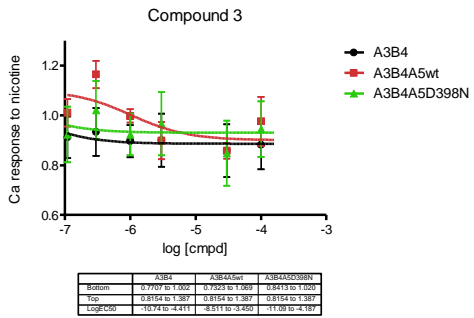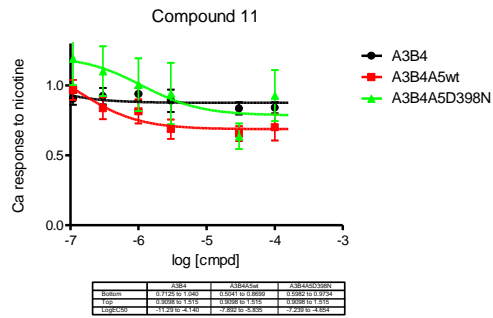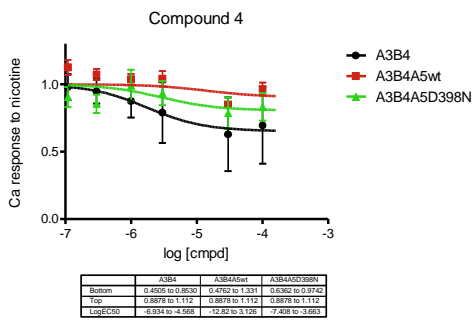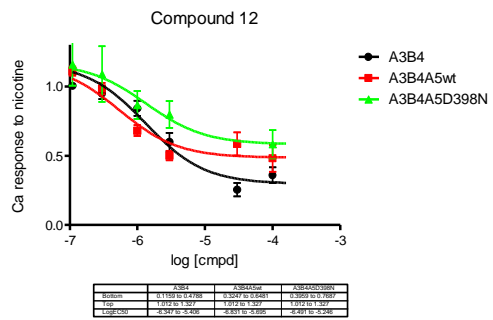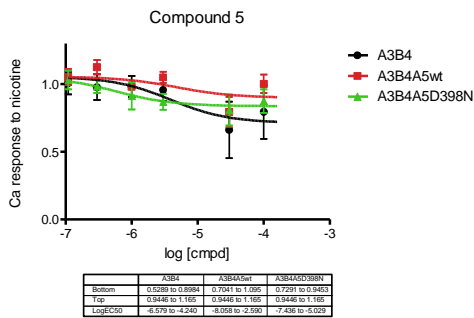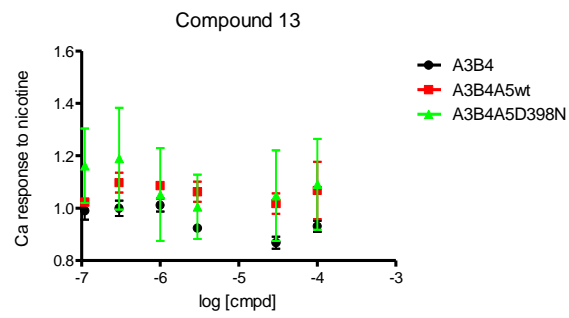

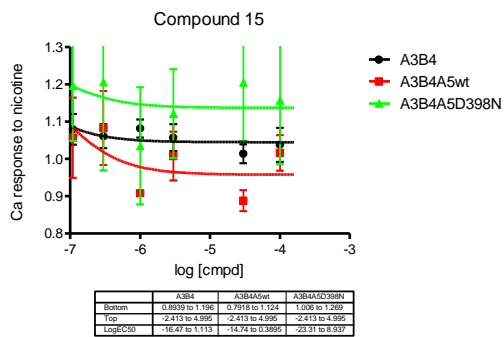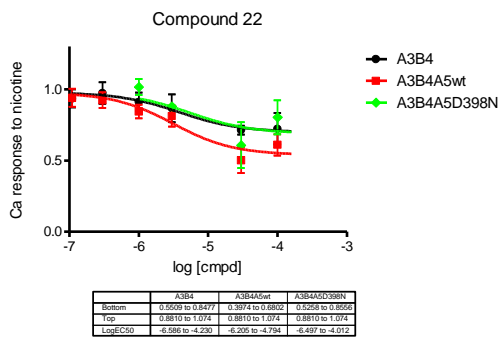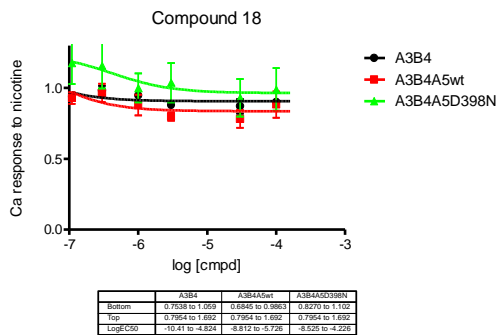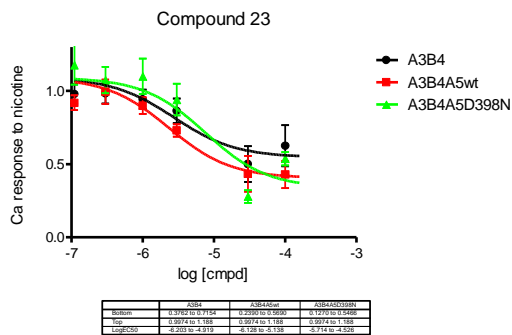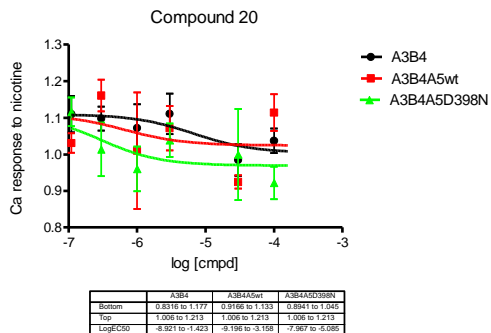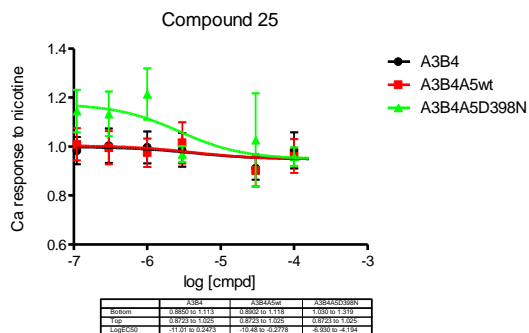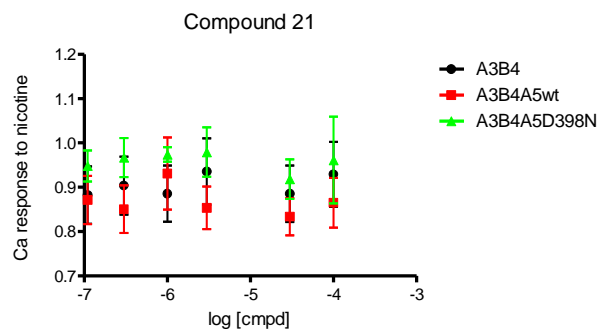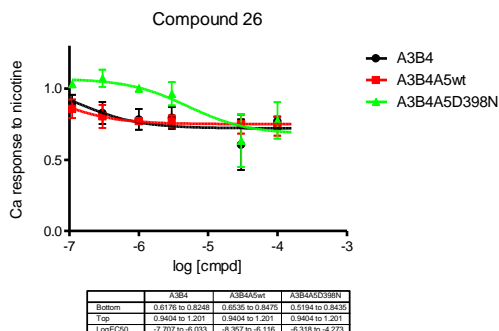

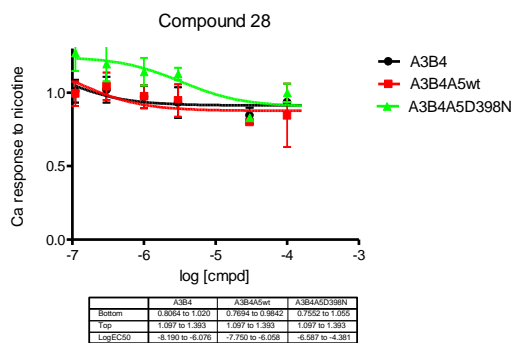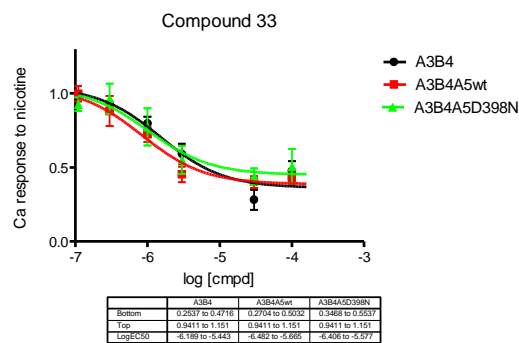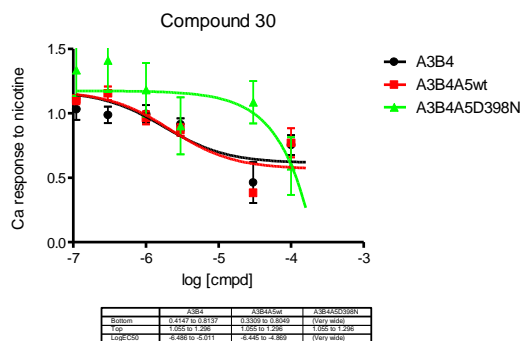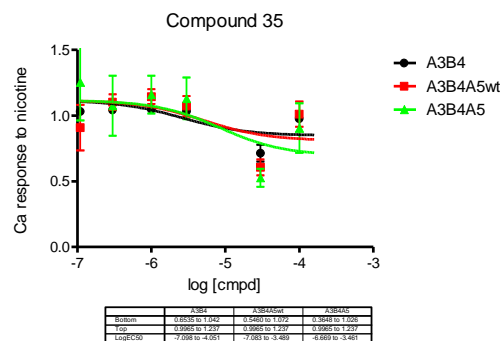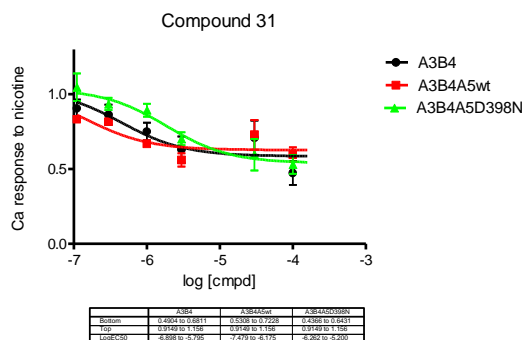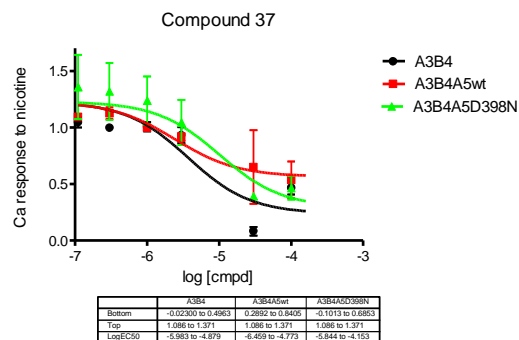

Supplemental Figure 2S
